# Supplementary material for: Sequential Michael addition/retro-Claisen condensation of aromatic β-diketones with α,β-unsaturated esters: an approach to obtain 1,5-ketoesters
Source: Royal Society of Chemistry journal article supplement (doi:10.1039/c5ob02570b), 2016-01-01

**Sequential Michael addition /retro-Claisen condensation of  
aromatic  $\beta$ -diketones with  $\alpha$ ,  $\beta$ -unsaturated esters: an approach to  
1, 5-ketoesters**

Gui-Xin Cai<sup>a,b,\*</sup>, Jing Wen<sup>a</sup>, Ting-Ting Lai<sup>a</sup>, Xie Dan<sup>a</sup>, Cheng-He Zhou<sup>a,\*</sup>

<sup>a</sup> Key Laboratory of Applied Chemistry of Chongqing Municipality, Institute of Bioorganic & Medicinal Chemistry, School of Chemistry and Chemical Engineering, Southwest University, Chongqing 400715, China

<sup>b</sup> Beijing National Laboratory for Molecular Sciences, Beijing 100190, China

E-mail: gxcai@swu.edu.cn; zhouch@swu.edu.cn.

**Contents of Supporting Information:**

|                                               |      |
|-----------------------------------------------|------|
| <b>I. Experimental Section</b> .....          | 2    |
| <b>II. Spectra data of the products</b> ..... | 2-7  |
| <b>III. References</b> .....                  | 7    |
| <b>IV. Spectra</b> .....                      | 8-35 |

## I. Experimental Section

### General Information

All reactions were carried out using 20 mL sealed tube. All chemicals obtained from commercial suppliers were utilized without further purification unless otherwise noted. NMR Spectra were recorded on a Bruker 600 MHz NMR spectrometer. The chemical shift is given in dimensionless  $\delta$  values and is frequency referenced relative to TMS in  $^1\text{H}$  and  $^{13}\text{C}$  NMR spectroscopy. Chemical shifts are reported relative to  $\text{CDCl}_3$  ( $\delta = 7.26$  ppm) for  $^1\text{H}$  NMR and relative to  $\text{CDCl}_3$  ( $\delta = 77$  ppm) for  $^{13}\text{C}$  NMR. FT-IR spectra were tested by Bruker RFS100/S spectrophotometer (Bio-Rad, Cambridge, MA, USA) using KBr pellets in the  $400\text{-}4000\text{ cm}^{-1}$  range. The mass spectra were recorded on LCMS-2010A and the high resolution mass spectra (HRMS) were recorded on an Ion Spec FTICR mass spectrometer with ESI resource.

### General experimental procedures for the synthesis of compounds 4 and 7

Aromatic  $\beta$ -diketones (0.5 mmol), acrylates (1 mmol),  $\text{K}_2\text{CO}_3$  (0.1 mmol, 10 mol %) and dehydrated alcohol (0.5-2 mL) as noted were put into the 20 mL sealed tube. The reaction mixture was stirred at  $85\text{ }^\circ\text{C}$  for required time. After cooled to room temperature, the mixture was concentrated in vacuo. The desired products **4/7** were obtained in the corresponding yields after purification by flash chromatography on neutral  $\text{Al}_2\text{O}_3$  with the eluent (EA/PE = 1/15-1/5).

### General procedures for the synthesis of compounds 5

1, 3-diphenylpropane-1,3-dione (0.5 mmol), acrylates (1 mmol),  $\text{K}_2\text{CO}_3$  (0.1 mmol, 10 mol %) and the corresponding alcohol solution (0.5-2 mL) as noted were put into the 20 mL sealed tube. The reaction mixture was stirred at  $85\text{ }^\circ\text{C}$  for required time. After cooled to room temperature, the mixture was concentrated via vacuum distillation. The desired products **5** were obtained in the corresponding yields after purification by flash chromatography on neutral  $\text{Al}_2\text{O}_3$  with the eluent (EA/PE = 1/15-1/5).

## II. Spectra data of the products

*Ethyl 5-oxo-5-phenylpentanoate (4a)*:<sup>1</sup> The title compound was prepared according to general procedure for the synthesis of compounds **4**, the crude product was purified by column chromatography on neutral  $\text{Al}_2\text{O}_3$  and eluted with ethyl acetate/petroleum ether (1/5) to afford a colourless oily liquid:  $R_f = 0.47$  (EA/PE 1/5). Isolated yield: 107 mg, 98%.  $^1\text{H}$  NMR (600 MHz,  $\text{CDCl}_3$ ,  $25\text{ }^\circ\text{C}$ , TMS)  $\delta$  7.97 (d,  $J = 7.6$  Hz, 2H), 7.56 (t,  $J = 7.4$  Hz, 1H), 7.46 (t,  $J = 7.6$  Hz, 2H),

4.14 (q,  $J = 7.1$  Hz, 2H), 3.06 (t,  $J = 7.2$  Hz, 2H), 2.43 (t,  $J = 7.2$  Hz, 2H), 2.08 (p,  $J = 7.2$  Hz, 2H), 1.26 (t,  $J = 7.1$  Hz, 3H);  $^{13}\text{C}$  NMR (151 MHz,  $\text{CDCl}_3$ , 25 °C, TMS)  $\delta$  199.45, 173.26, 136.96, 133.06, 128.62, 128.06, 60.37, 37.52, 33.48, 19.50, 14.25; MS (ESI):  $m/z$ :  $[M + H]^+$  221.1; IR (KBr)  $\nu$  3441, 3061, 2980, 2937, 2390, 1731, 1685, 1597, 1580, 1448, 1208, 1002, 691  $\text{cm}^{-1}$ .

*Ethyl 2-methyl-5-oxo-5-phenylpentanoate (4b)*: The title compound was prepared according to general procedure for the synthesis of compounds **4** from 1,3-diphenylpropane-1,3-dione (112 mg, 0.5 mmol) and *tert*-butyl methacrylate (126  $\mu\text{L}$ , 1 mmol), the crude product was purified by column chromatography on neutral  $\text{Al}_2\text{O}_3$  and eluted with ethyl acetate/petroleum ether (1/10) to afford a colourless oily liquid:  $R_f = 0.62$  (EA/PE 1/10). Isolated yield: 84 mg, 72%.  $^1\text{H}$  NMR (600 MHz,  $\text{CDCl}_3$ , 25 °C, TMS):  $\delta$  7.95 (d,  $J = 7.2$  Hz, 2H), 7.55 (t,  $J = 7.4$  Hz, 1H), 7.46 (t,  $J = 7.7$  Hz, 2H), 4.14 (q,  $J = 7.1$  Hz, 2H), 3.10-2.92 (m, 2H), 2.56 (dq,  $J = 14.0, 7.0$  Hz, 1H), 2.13-1.87 (m, 2H), 1.30-1.17 (m, 6H);  $^{13}\text{C}$  NMR (151 MHz,  $\text{CDCl}_3$ , 25 °C, TMS)  $\delta$  199.47, 176.17, 136.93, 132.98, 128.57, 128.01, 60.29, 38.93, 36.05, 27.98, 17.28, 14.21; HRMS (ESI-TOF)  $m/z$ :  $[M+H]^+$  Calcd for  $\text{C}_{14}\text{H}_{19}\text{O}_3$  235.1334; Found 235.1329; IR (KBr)  $\nu$  3440, 3062, 2977, 2936, 2390, 1729, 1686, 1449, 1159, 744, 658  $\text{cm}^{-1}$ .

*Ethyl 5-(4-methoxyphenyl)-5-oxopentanoate (4d)*:<sup>2</sup> The title compound was prepared according to general procedure for the synthesis of compounds **4** from 1,3-bis(4-methoxyphenyl)propane-1,3-dione (142 mg, 0.5 mmol) and ethyl acrylate (108  $\mu\text{L}$ , 1 mmol), the crude product was purified by column chromatography on neutral  $\text{Al}_2\text{O}_3$  and eluted with ethyl acetate/petroleum ether (1/5) to afford a white solid:  $R_f = 0.31$  (EA/PE = 1/5). Isolated yield: 175 mg, 70%; Melting point: 58-59 °C.  $^1\text{H}$  NMR (600 MHz,  $\text{CDCl}_3$ , 25 °C, TMS)  $\delta$  7.95 (d,  $J = 8.6$  Hz, 2H), 6.93 (d,  $J = 8.6$  Hz, 2H), 4.14 (q,  $J = 7.1$  Hz, 2H), 3.86 (s, 3H), 2.99 (t,  $J = 7.2$  Hz, 2H), 2.42 (t,  $J = 7.2$  Hz, 2H), 2.06 (p,  $J = 7.2$  Hz, 2H), 1.25 (t,  $J = 7.1$  Hz, 3H);  $^{13}\text{C}$  NMR (151 MHz,  $\text{CDCl}_3$ , 25 °C, TMS)  $\delta$  197.99, 173.27, 163.47, 130.27, 130.01, 113.72, 60.28, 55.42, 37.13, 33.49, 19.67, 14.20; HRMS (ESI-TOF)  $m/z$ :  $[M+H]^+$  Calcd for  $\text{C}_{14}\text{H}_{19}\text{O}_4$  251.1283; Found 251.1277; IR (KBr)  $\nu$  3452, 3416, 2982, 2943, 2845, 1929, 1734, 1668, 1313, 1279, 1217, 1184, 987, 834, 753, 586  $\text{cm}^{-1}$ .

*Ethyl 5-oxo-5-(pyridine-2-yl)pentanoate (4e)*:<sup>3</sup> The title compound was prepared according to general procedure for the synthesis of compounds **4**, the crude product was purified by column chromatography on neutral  $\text{Al}_2\text{O}_3$  and eluted with ethyl acetate/petroleum ether (1/5) to afford a colourless oily liquid:  $R_f = 0.28$  (EA/PE = 1/5). Isolated yield: 83 mg, 75%.  $^1\text{H}$  NMR (600 MHz,

CDCl<sub>3</sub>, 25 °C, TMS) δ 8.67 (d, J = 4.7 Hz, 1H), 8.04 (d, J = 7.8 Hz, 1H), 7.84 (t, J = 7.7 Hz, 1H), 7.51-7.44 (m, 1H), 4.14 (q, J = 7.1 Hz, 2H), 3.29 (t, J = 7.3 Hz, 2H), 2.44 (t, J = 7.4 Hz, 2H), 2.08 (p, J = 7.3 Hz, 2H), 1.25 (t, J = 7.1 Hz, 3H); <sup>13</sup>C NMR (151 MHz, CDCl<sub>3</sub>, 25 °C, TMS) δ 201.08, 173.20, 153.33, 148.91, 136.83, 127.06, 121.69, 60.24, 36.80, 33.61, 19.22, 14.19; MS (ESI) m/z: [M]<sup>+</sup> 221.0; IR (KBr) ν 3444, 3056, 2938, 2390, 1732, 1697, 1583, 1439, 1373, 994, 682 cm<sup>-1</sup>.

*Ethyl 5-(4-(tert-butyl)phenyl)-5-oxopentanoate (4f)*:<sup>4</sup> The title compound was prepared according to general procedure for the synthesis of compounds **4**, the crude product was purified by column chromatography on neutral Al<sub>2</sub>O<sub>3</sub> and eluted with ethyl acetate/petroleum ether (1/5) to afford a colourless oily liquid : R<sub>f</sub> = 0.53 (EA/PE =1/5). Isolated yield: 55 mg, 40%. <sup>1</sup>H NMR (600 MHz, CDCl<sub>3</sub>, 25 °C, TMS) δ 7.91 (d, J = 8.1 Hz, 2H), 7.47 (d, J = 8.1 Hz, 2H), 4.14 (q, J = 7.1 Hz, 2H), 3.03 (t, J = 7.1 Hz, 2H), 2.42 (t, J = 7.2 Hz, 2H), 2.07 (p, J = 7.1 Hz, 2H), 1.34 (s, 9H), 1.25 (t, J = 7.1 Hz, 3H); <sup>13</sup>C NMR (151 MHz, CDCl<sub>3</sub>, 25 °C, TMS) δ 199.08, 173.24, 156.76, 134.36, 128.01, 125.51, 60.29, 37.38, 35.07, 33.48, 31.07, 19.57, 14.22; HRMS (ESI-TOF) m/z: [M+H]<sup>+</sup> Calcd for C<sub>17</sub>H<sub>25</sub>O<sub>3</sub> 277.1804; Found 277.1799; IR (KBr) ν 3349, 3055, 2964, 2907, 2870, 1733, 1682, 1605, 1566, 1407, 1191, 1028, 988, 734, 545 cm<sup>-1</sup>.

*Methyl 5-oxo-5-phenylpentanoate (5a)*:<sup>5</sup> The title compound was prepared according to general procedure for the synthesis of compounds **5**, the crude product was purified by column chromatography on neutral Al<sub>2</sub>O<sub>3</sub> and eluted with ethyl acetate/petroleum ether (1/5) to afford a colourless oily liquid : R<sub>f</sub> = 0.50 (EA/PE =1/5). Isolated yield: 77 mg, 75%. <sup>1</sup>H NMR (600 MHz, CDCl<sub>3</sub>, 25 °C, TMS) δ 7.96 (d, J = 7.8 Hz, 2H), 7.56 (t, J = 7.4 Hz, 1H), 7.46 (t, J = 7.7 Hz, 2H), 3.68 (s, 3H), 3.06 (t, J = 7.2 Hz, 2H), 2.45 (t, J = 7.2 Hz, 2H), 2.08 (p, J = 7.2 Hz, 2H); <sup>13</sup>C NMR (151 MHz, CDCl<sub>3</sub>, 25 °C, TMS) δ 199.37, 173.68, 136.94, 133.07, 128.62, 128.05, 51.54, 37.49, 33.19, 19.43; MS (ESI) m/z: [M + H]<sup>+</sup> 207.1; IR (KBr) ν 3450, 3353, 3061, 2951, 1735, 1685, 1448, 1257, 745, 658 cm<sup>-1</sup>.

*Butyl 5-oxo-5-phenylpentanoate (5b)*:<sup>6</sup> The title compound was prepared according to general procedure for the synthesis of compounds **5**, the crude product was purified by column chromatography on neutral Al<sub>2</sub>O<sub>3</sub> and eluted with ethyl acetate/petroleum ether (1/5) to afford a colourless oily liquid : R<sub>f</sub> = 0.47 (EA/PE =1/5). Isolated yield: 99 mg, 80%. <sup>1</sup>H NMR (600 MHz, CDCl<sub>3</sub>, 25 °C, TMS) δ 7.96 (d, J = 8.3 Hz, 2H), 7.56 (t, J = 7.4 Hz, 1H), 7.46 (t, J = 7.7 Hz, 2H), 4.09 (t, J = 6.7 Hz, 2H), 3.05 (t, J = 7.2 Hz, 2H), 2.44 (t, J = 7.2 Hz, 2H), 2.08 (p, J = 7.2 Hz, 2H),

1.64-1.54 (m, 2H), 1.42-1.32 (m, 2H), 0.93 (t,  $J = 7.4$  Hz, 3H);  $^{13}\text{C}$  NMR (151 MHz,  $\text{CDCl}_3$ , 25 °C, TMS)  $\delta$  199.41, 173.33, 136.96, 133.05, 128.62, 128.05, 64.31, 37.52, 33.47, 30.73, 19.52, 19.17, 13.69; HRMS (ESI-TOF)  $m/z$ :  $[\text{M}+\text{H}]^+$  Calcd for  $\text{C}_{15}\text{H}_{21}\text{O}_3$  249.1491; Found 249.1489; IR (KBr)  $\nu$  3440, 3159, 2961, 2873, 2254, 1730, 1686, 1598, 1450, 1209, 1067, 912, 733  $\text{cm}^{-1}$ .

*Hexyl 5-oxo-5-phenylpentanoate (5c)*:<sup>7</sup> The title compound was prepared according to general procedure for the synthesis of compounds **5**, the crude product was purified by column chromatography on neutral  $\text{Al}_2\text{O}_3$  and eluted with ethyl acetate/petroleum ether (1/5) to afford a colourless oily liquid :  $R_f = 0.47$  (EA/PE =1/5). Isolated yield: 83 mg, 75%.  $^1\text{H}$  NMR (600 MHz,  $\text{CDCl}_3$ , 25 °C, TMS)  $\delta$  7.96 (d,  $J = 8.0$  Hz, 2H), 7.57 (dd,  $J = 17.8, 10.4$  Hz, 1H), 7.46 (t,  $J = 7.5$  Hz, 2H), 4.07 (t,  $J = 6.7$  Hz, 2H), 3.06 (t,  $J = 7.2$  Hz, 2H), 2.44 (t,  $J = 7.2$  Hz, 2H), 2.12-2.03 (m, 2H), 1.65-1.57 (m, 2H), 1.37-1.24 (m, 6H), 0.88 (t,  $J = 6.7$  Hz, 3H);  $^{13}\text{C}$  NMR (151 MHz,  $\text{CDCl}_3$ , 25 °C, TMS)  $\delta$  199.38, 173.29, 136.89, 132.99, 128.55, 127.99, 64.57, 37.46, 33.41, 31.38, 28.58, 25.56, 22.47, 19.45, 13.91; MS (ESI)  $m/z$ :  $[\text{M} + \text{H}]^+$  277.2; IR (KBr)  $\nu$  3029, 2921, 2857, 1734, 1684, 1958, 1540, 1452, 1235, 1071, 1015, 812, 693  $\text{cm}^{-1}$ .

*Benzyl 5-oxo-5-phenylpentanoate (5d)*: The title compound was prepared according to general procedure for the synthesis of compounds **5**, the crude product was purified by column chromatography on neutral  $\text{Al}_2\text{O}_3$  and eluted with ethyl acetate/petroleum ether (1/10) to afford a colourless oily liquid :  $R_f = 0.38$  (EA/PE 1/10). Isolated yield: 69 mg, 49%.  $^1\text{H}$  NMR (600 MHz,  $\text{CDCl}_3$ , 25 °C, TMS)  $\delta$  7.92 (d,  $J = 7.3$  Hz, 2H), 7.55 (t,  $J = 7.4$  Hz, 1H), 7.44 (t,  $J = 7.7$  Hz, 2H), 7.37-7.28 (m, 5H), 5.13 (s, 2H), 3.03 (t,  $J = 7.2$  Hz, 2H), 2.49 (t,  $J = 7.2$  Hz, 2H), 2.09 (p,  $J = 7.2$  Hz, 2H);  $^{13}\text{C}$  NMR (151 MHz,  $\text{CDCl}_3$ , 25 °C, TMS)  $\delta$  199.32, 173.03, 136.90, 136.04, 133.03, 128.59, 128.57, 128.22, 128.03, 66.23, 37.40, 33.42, 19.45; HRMS (ESI-TOF)  $m/z$ :  $[\text{M}+\text{H}]^+$  Calcd for  $\text{C}_{18}\text{H}_{19}\text{O}_3$  283.1334; Found 283.1332; IR (KBr)  $\nu$  3443, 3063, 2941, 1734, 1685, 1597, 1450, 1257, 1211, 1074, 745, 694  $\text{cm}^{-1}$ .

*tert-Butyl 5-oxo-5-phenylpentanoate (5e)*:<sup>8</sup> The title compound was prepared according to general procedure for the synthesis of compounds **5**, the crude product was purified by column chromatography on neutral  $\text{Al}_2\text{O}_3$  and eluted with ethyl acetate/petroleum ether (1/10) to afford a colourless oily liquid :  $R_f = 0.63$  (EA/PE 1/10). Isolated yield: 112 mg, 90%.  $^1\text{H}$  NMR (600 MHz,  $\text{CDCl}_3$ , 25 °C, TMS)  $\delta$  7.96 (d,  $J = 8.4$  Hz, 2H), 7.56 (t,  $J = 8.5$  Hz, 1H), 7.46 (t,  $J = 7.7$  Hz, 2H), 3.04 (t,  $J = 7.2$  Hz, 2H), 2.34 (t,  $J = 7.2$  Hz, 2H), 2.03 (p,  $J = 7.2$  Hz, 2H), 1.45 (s, 9H);  $^{13}\text{C}$  NMR

(151 MHz, CDCl<sub>3</sub>, 25 °C, TMS)  $\delta$  199.54, 172.57, 136.95, 132.98, 128.57, 128.02, 80.26, 37.51, 34.69, 28.12, 19.69; MS (ESI)  $m/z$ :  $[M + Na]^+$  271.1; IR (KBr)  $\nu$  3435, 3354, 3062, 2977, 2934, 1726, 1686, 1597, 1450, 1390, 1147, 751, 691, 658, 590 cm<sup>-1</sup>.

*2-Methoxyethyl 5-oxo-5-phenylpentanoate (5g)*:<sup>9</sup> The title compound was prepared according to general procedure for the synthesis of compounds **5**, the crude product was purified by column chromatography on neutral Al<sub>2</sub>O<sub>3</sub> and eluted with ethyl acetate/petroleum ether (1/10) to afford a colourless oily liquid :  $R_f$  = 0.42 (EA/PE = 1/10). Isolated yield: 100 mg, 80%. <sup>1</sup>H NMR (600 MHz, CDCl<sub>3</sub>, 25 °C, TMS)  $\delta$  7.96 (d,  $J$  = 7.3 Hz, 2H), 7.56 (t,  $J$  = 7.4 Hz, 1H), 7.46 (t,  $J$  = 7.7 Hz, 2H), 4.24 (t, 2H), 3.59 (t, 2H), 3.37 (s, 3H), 3.06 (t,  $J$  = 7.2 Hz, 2H), 2.49 (t,  $J$  = 7.2 Hz, 2H), 2.09 (p,  $J$  = 7.2 Hz, 2H); <sup>13</sup>C NMR (151 MHz, CDCl<sub>3</sub>, 25 °C, TMS)  $\delta$  199.33, 173.16, 136.87, 133.00, 128.55, 127.99, 70.42, 63.36, 58.88, 37.39, 33.23, 19.37; HRMS (ESI-TOF)  $m/z$ :  $[M+H]^+$  Calcd for C<sub>14</sub>H<sub>19</sub>O<sub>4</sub> 251.1283; Found 251.1276; IR (KBr)  $\nu$  3451, 3353, 3061, 2934, 2893, 2821, 2393, 1733, 1684, 1580, 1449, 1179, 1100, 985, 749, 692, 658, 569 cm<sup>-1</sup>.

*(Tetrahydrofuran-2-yl)ethyl-5-oxo-5-phenylpentanoate (5h)*: The title compound was prepared according to general procedure for the synthesis of compounds **5**, the crude product was purified by column chromatography on neutral Al<sub>2</sub>O<sub>3</sub> and eluted with ethyl acetate/petroleum ether (1/10) to afford a colourless oily liquid :  $R_f$  = 0.35 (EA/PE = 1/10). Isolated yield: 125 mg, 91%. <sup>1</sup>H NMR (600 MHz, CDCl<sub>3</sub>, 25 °C, TMS)  $\delta$  7.96 (d,  $J$  = 7.8 Hz, 2H), 7.55 (t,  $J$  = 7.3 Hz, 1H), 7.46 (t,  $J$  = 7.6 Hz, 2H), 4.17 (dd,  $J$  = 11.3, 3.4 Hz, 1H), 4.11 (dt,  $J$  = 6.9, 5.2 Hz, 1H), 4.03 (dd,  $J$  = 11.3, 6.8 Hz, 1H), 3.87 (dd,  $J$  = 14.6, 7.2 Hz, 1H), 3.78 (dd,  $J$  = 14.5, 7.3 Hz, 1H), 3.06 (t,  $J$  = 7.2 Hz, 2H), 2.49 (t,  $J$  = 7.1 Hz, 2H), 2.08 (p,  $J$  = 7.1 Hz, 2H), 1.99 (dt,  $J$  = 12.4, 7.5 Hz, 1H), 1.95 – 1.83 (m, 2H), 1.60 (dt,  $J$  = 19.6, 7.5 Hz, 1H); <sup>13</sup>C NMR (151 MHz, CDCl<sub>3</sub>, 25 °C, TMS)  $\delta$  199.40, 173.19, 136.93, 133.04, 128.60, 128.05, 76.51, 68.42, 66.46, 37.47, 33.30, 28.02, 25.67, 19.45; HRMS (ESI-TOF)  $m/z$ :  $[M+H]^+$  Calcd for C<sub>16</sub>H<sub>21</sub>O<sub>4</sub> 277.1440; Found 277.1431; IR (KBr)  $\nu$  3749, 3442, 3061, 2950, 2874, 2391, 2347, 1734, 1684, 1449, 1209, 1076, 999, 750, 692, 659, 570 cm<sup>-1</sup>.

*2,2,2-Trifluoroethyl 5-oxo-5-phenylpentanoate (5i)*:<sup>10</sup> The title compound was prepared according to general procedure for the synthesis of compounds **5**, the crude product was purified by column chromatography on neutral Al<sub>2</sub>O<sub>3</sub> and eluted with ethyl acetate/petroleum ether (1/10) to afford a colourless oily liquid :  $R_f$  = 0.49 (EA/PE = 1/10). Isolated yield: 22 mg, 16%. <sup>1</sup>H NMR (600 MHz, CDCl<sub>3</sub>, 25 °C, TMS)  $\delta$  7.96 (d,  $J$  = 7.2 Hz, 2H), 7.57 (t,  $J$  = 7.4 Hz, 1H), 7.47 (t,  $J$  = 7.7 Hz, 2H),

4.48 (q,  $J = 8.5$  Hz, 2H), 3.07 (t,  $J = 7.1$  Hz, 2H), 2.57 (t,  $J = 7.2$  Hz, 2H), 2.12 (p,  $J = 7.1$  Hz, 2H);  $^{13}\text{C}$  NMR (151 MHz,  $\text{CDCl}_3$ , 25 °C, TMS)  $\delta$  199.04, 171.65, 136.83, 133.19, 128.67, 128.02, 125.75, 123.92, 122.08, 120.24, 60.65, 60.40, 60.16, 59.92, 37.13, 32.78, 19.10; HRMS (ESI-TOF)  $m/z$ :  $[\text{M}+\text{H}]^+$  Calcd for  $\text{C}_{13}\text{H}_{14}\text{F}_3\text{O}_3$  275.0895; Found 275.0891; IR (KBr)  $\nu$  3491, 3395, 3336, 3075, 3012, 2849, 2811, 2421, 1756, 1676, 1451, 1290, 1273, 1183, 1149, 991, 736, 658, 572  $\text{cm}^{-1}$ .

*Benzyl 2-methyl-5-oxo-5-phenylpentanoate (5k)*: The title compound was prepared according to general procedure for the synthesis of compounds **5**, the crude product was purified by column chromatography on neutral  $\text{Al}_2\text{O}_3$  and eluted with ethyl acetate/petroleum ether (1/10) to afford a white solid :  $R_f = 0.45$  (EA/PE = 1/10). Isolated yield: 66 mg, 45%, melting point: 50-51 °C.  $^1\text{H}$  NMR (600 MHz,  $\text{CDCl}_3$ , 25 °C, TMS)  $\delta$  7.87 (d,  $J = 7.8$  Hz, 2H), 7.54 (t,  $J = 7.3$  Hz, 1H), 7.42 (t,  $J = 7.4$  Hz, 2H), 7.36-7.27 (m, 5H), 5.18-5.09 (m, 2H), 3.03-2.86 (m, 2H), 2.68-2.57 (m, 1H), 2.06 (td,  $J = 14.3, 8.5$  Hz, 1H), 1.95 (td,  $J = 14.3, 6.1$  Hz, 1H), 1.24 (d,  $J = 7.0$  Hz, 3H);  $^{13}\text{C}$  NMR (151 MHz,  $\text{CDCl}_3$ , 25 °C, TMS)  $\delta$  199.40, 175.99, 136.85, 136.12, 132.98, 128.54, 128.16, 128.01, 66.16, 38.94, 35.95, 28.00, 17.29; HRMS (ESI-TOF)  $m/z$ :  $[\text{M}+\text{H}]^+$  Calcd for  $\text{C}_{19}\text{H}_{21}\text{O}_3$  297.1491; Found 297.1489; IR (KBr)  $\nu$  3342, 3354, 3088, 2972, 2936, 2878, 2391, 1732, 1686, 1497, 1097, 695, 659  $\text{cm}^{-1}$ .

### III. References

1. Rieke, R. D.; Wehmeyer, R. M.; Wu, T. C.; Ebert, G. W. *Tetrahedron* **1989**, *45*, 443.
2. Guijarro, D.; Pablo, Ó.; Yus, M. *J. Org. Chem.* **2013**, *78*, 3647.
3. Yang, X. H.; Xie, J. H.; Liu, W. P.; Zhou, Q. L. *Angew. Chem. Int. Ed.* **2013**, *52*, 7833.
4. Cagniant, P.; Cagniant, M. P. *Bulletin de la Societe Chimique de France* **1956**, 1152.
5. Li, Z. N.; Wang, C. N.; Li, Z. C. *Beilstein J. Org. Chem.* **2015**, *11*, 213.
6. Wallingford, V. H.; Thorpe, M. A.; Homeyer, A. H. *J. Am. Chem. Soc.* **1942**, *64*, 580.
7. Hubertus, A.; Manfred, D.; Lothar, W. *Synthesis* **1987**, *3*, 251.
8. Yasuda, M.; Chiba, K.; Ohigashi, N.; Katoh, Y.; Baba, A. *J. Am. Chem. Soc.* **2003**, *125*, 7291.
9. Kang, Y. G.; Moon, S. J.; Lee, C. J.; Yoon, S. C.; Nam, S. Y.; Shin, W. S. Preparation of Ethyleneoxy-containing Methanofullerene Compounds for Organic Electronic Device, K. R. Patent 2009113607 Nov 02, **2009**.
10. Yoon, S. C.; Lee, J. W.; Lim, J. S.; Kim, D. U.; Lee, C. J. Fluorine-Substituted Methanofullerene Compounds and Organic Electronic Devices, K. R. 2008109288 Dec 17, **2008**.

## IV. Spectra

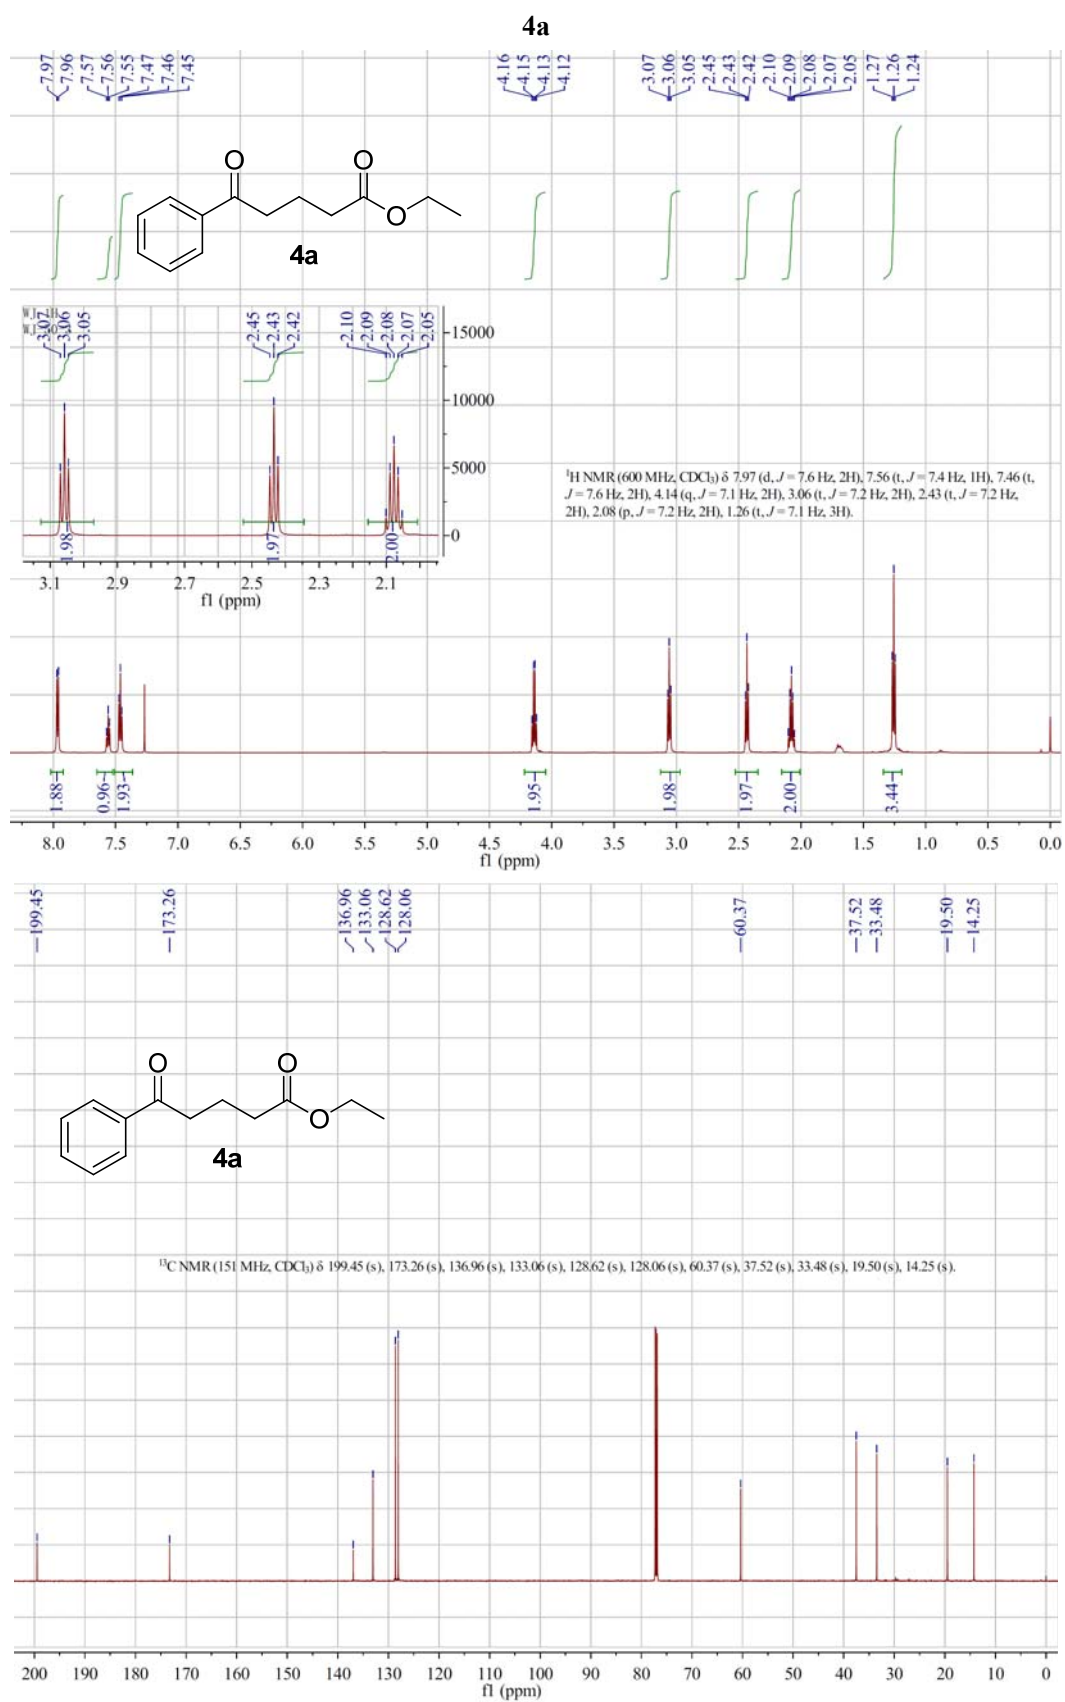



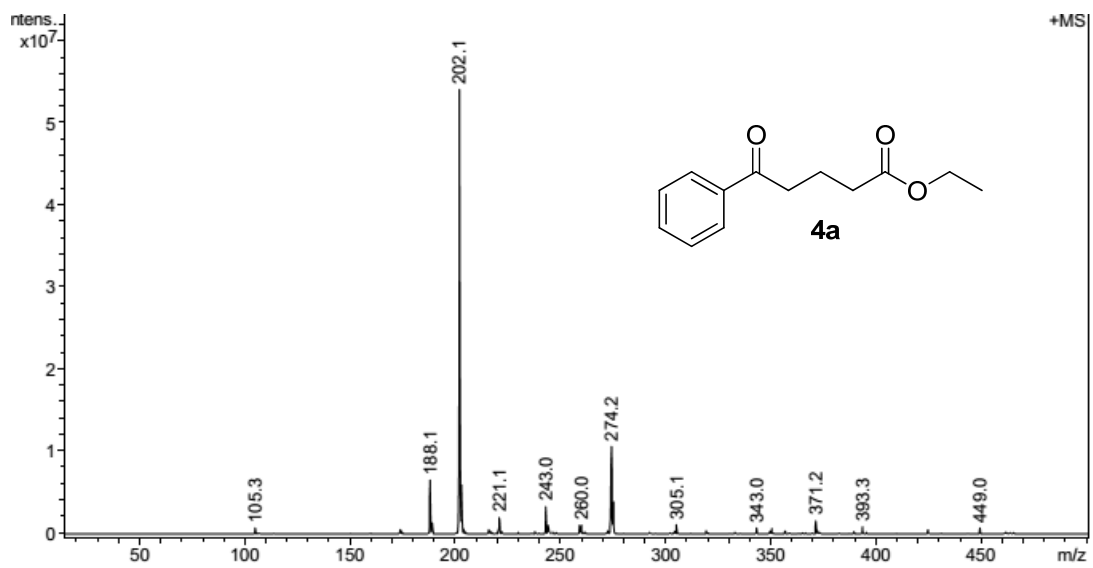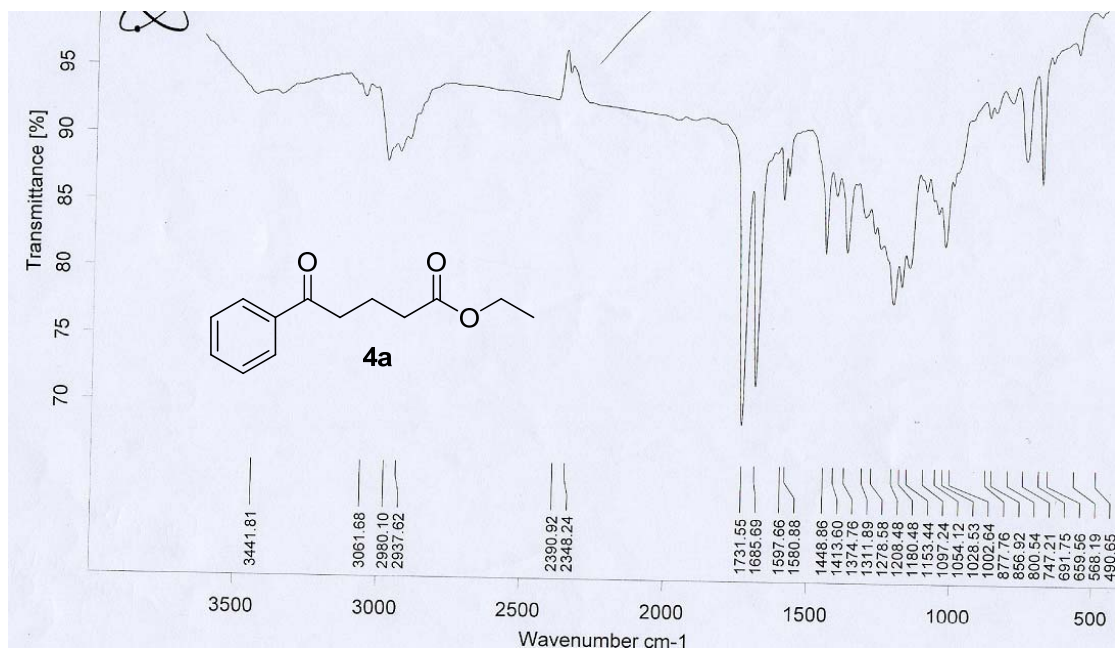

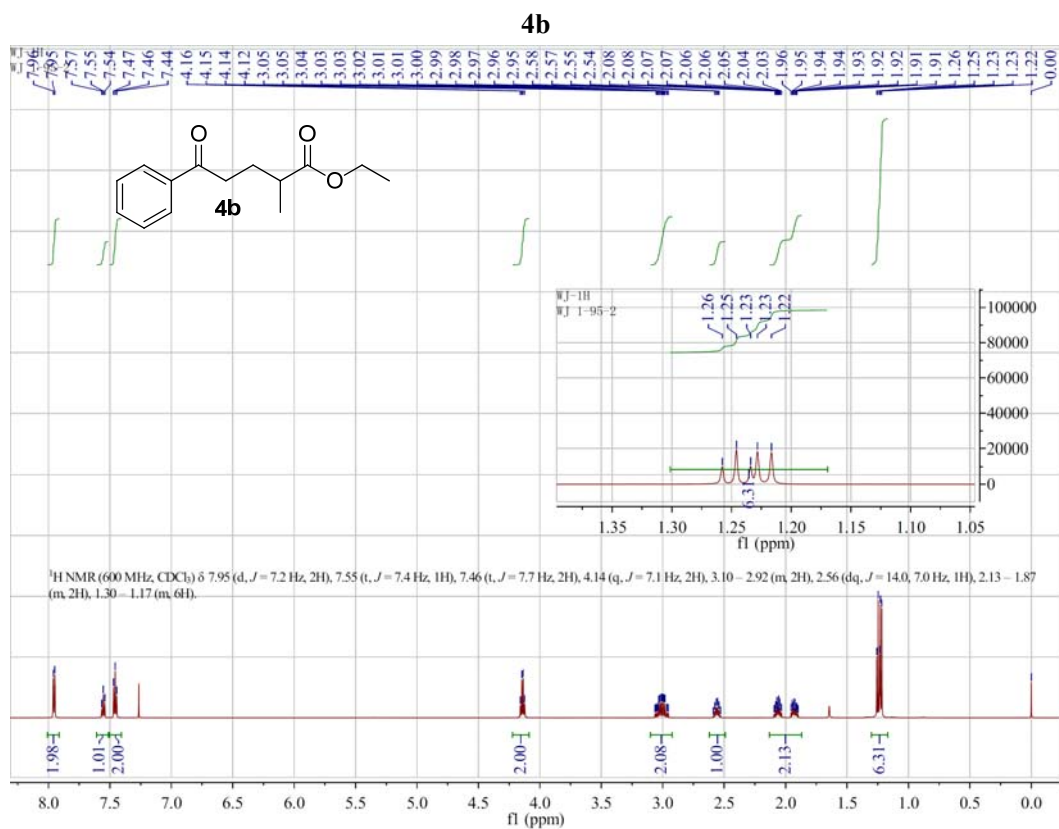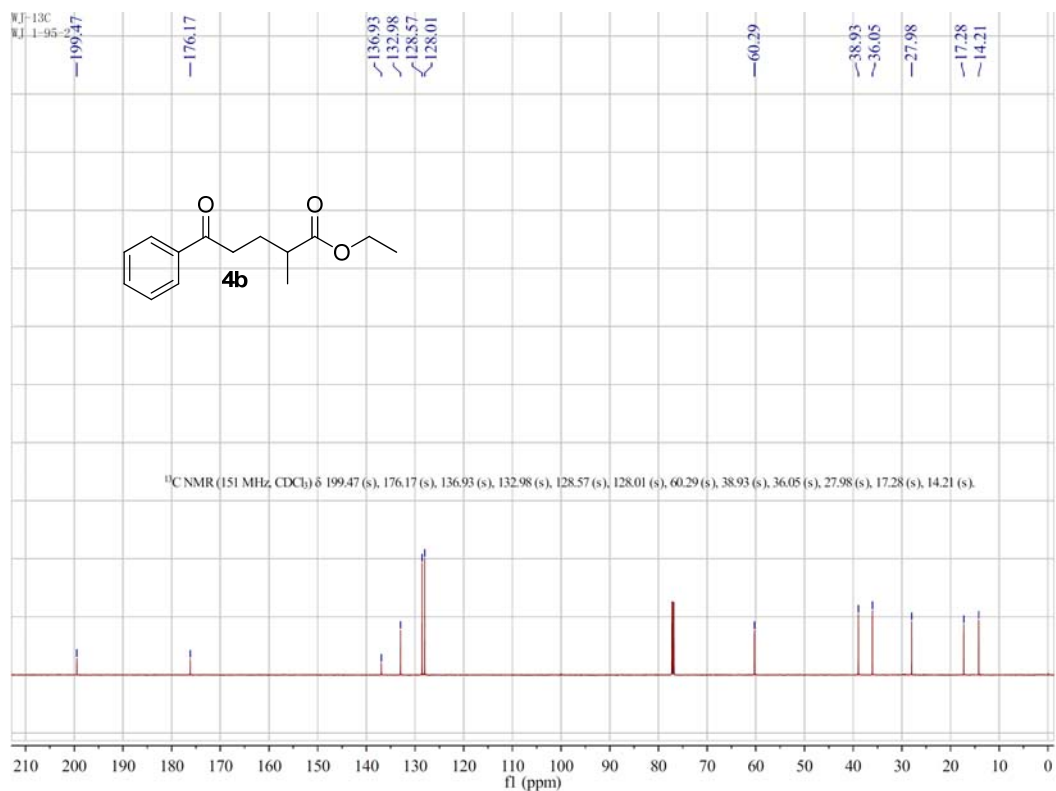

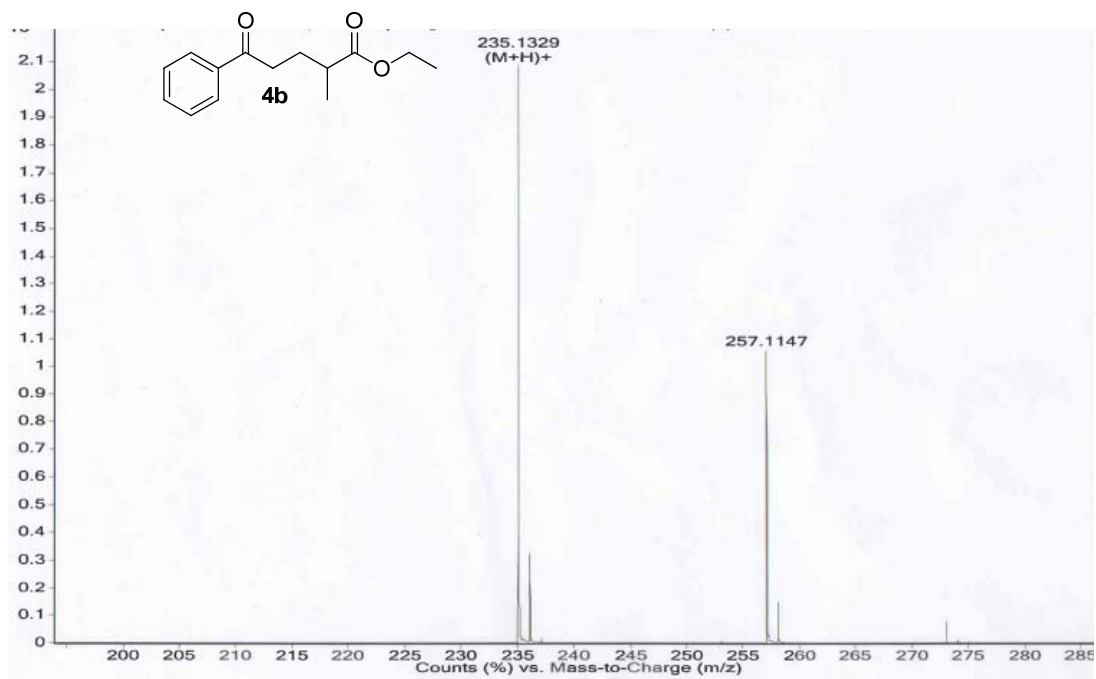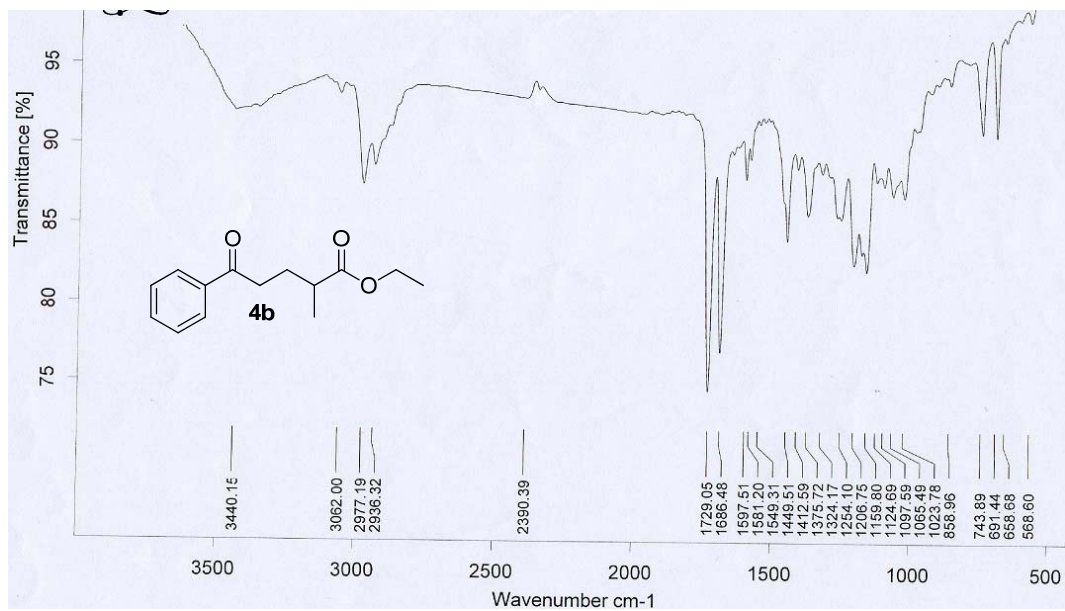

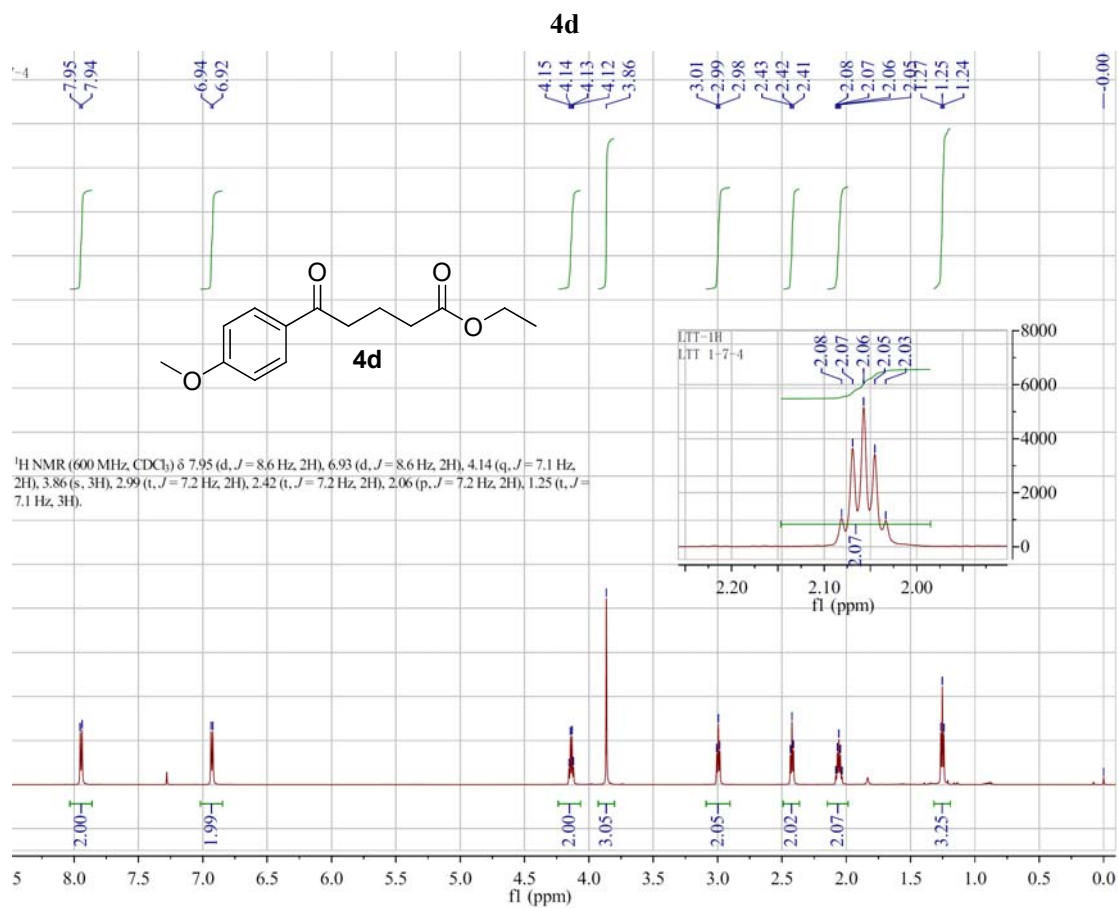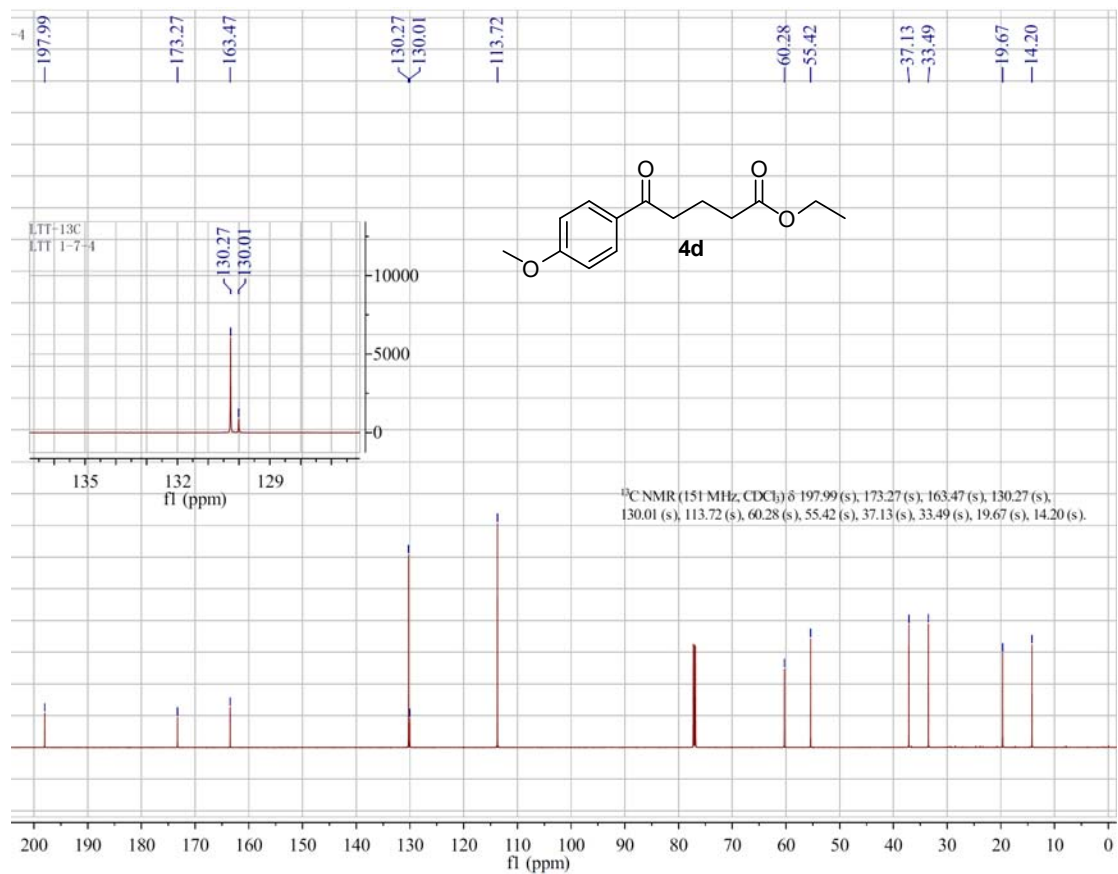

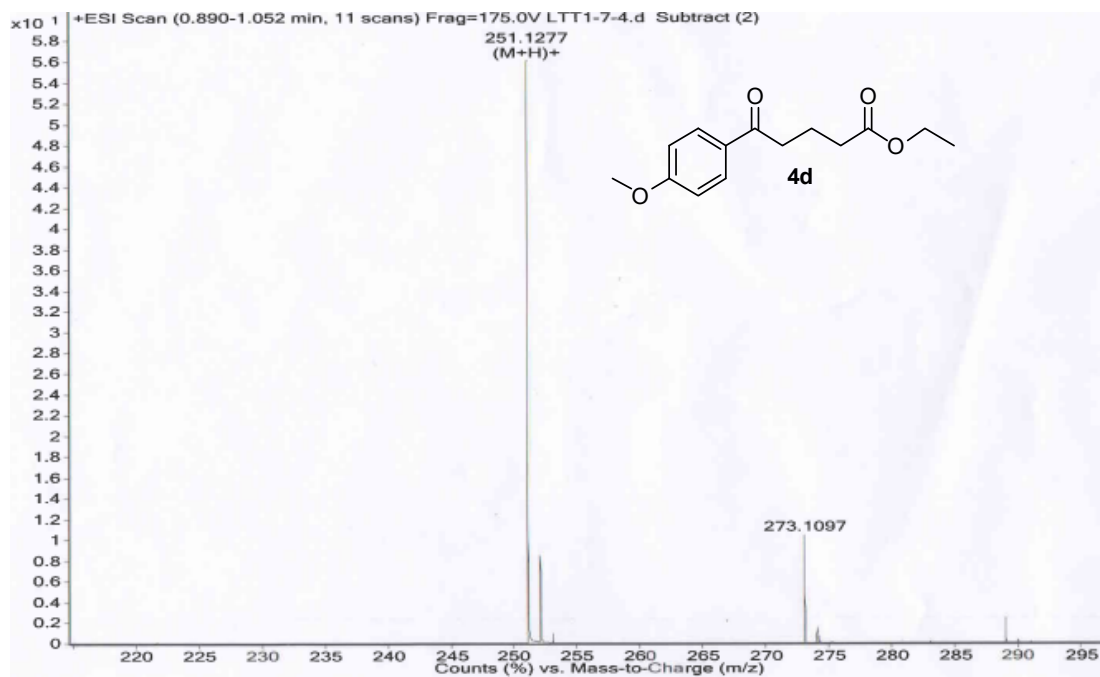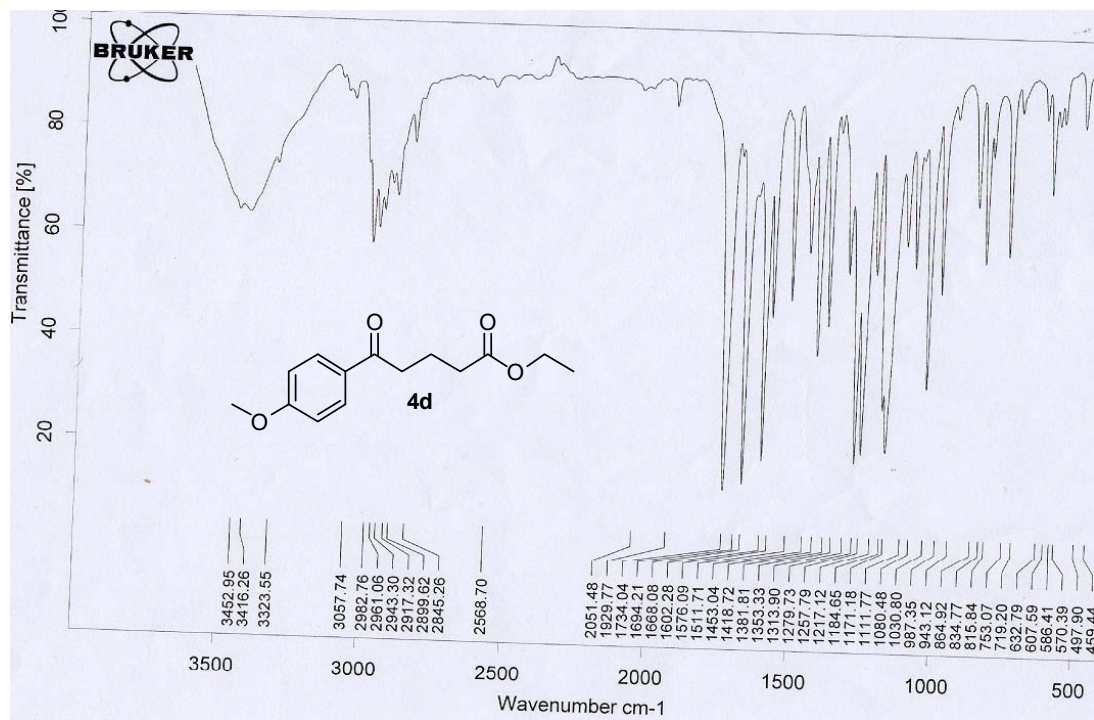

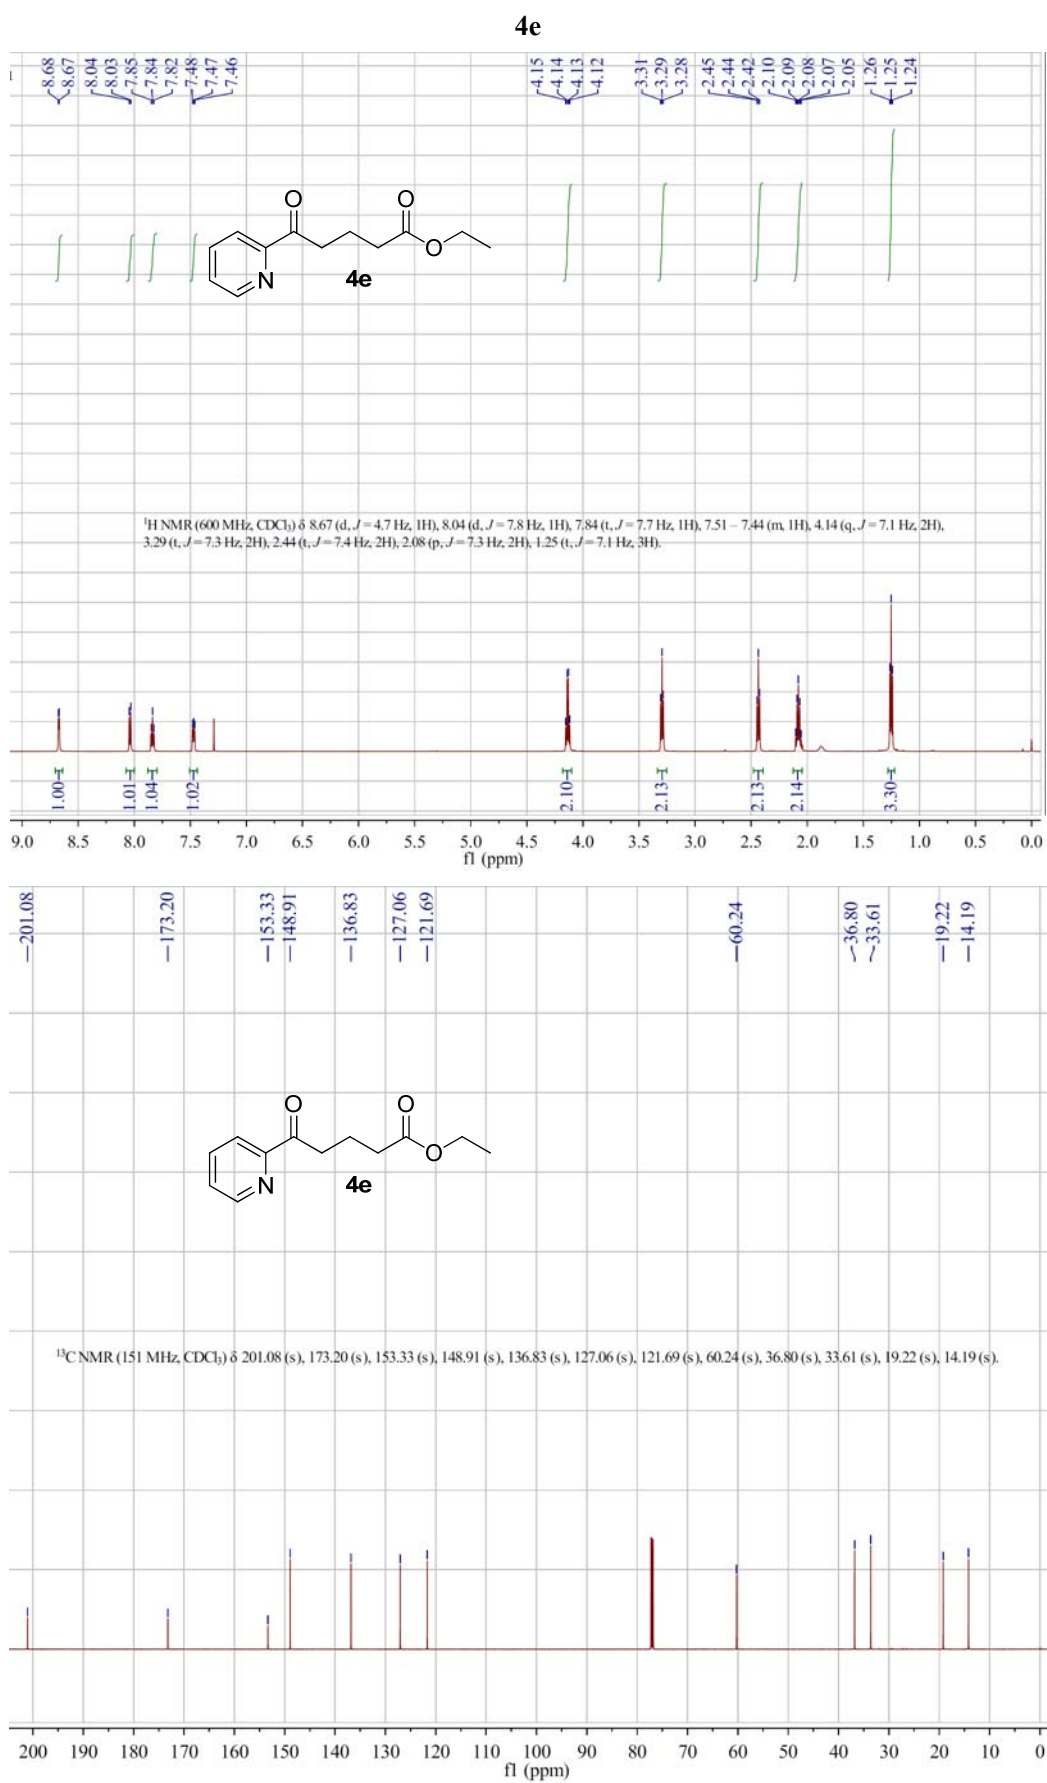

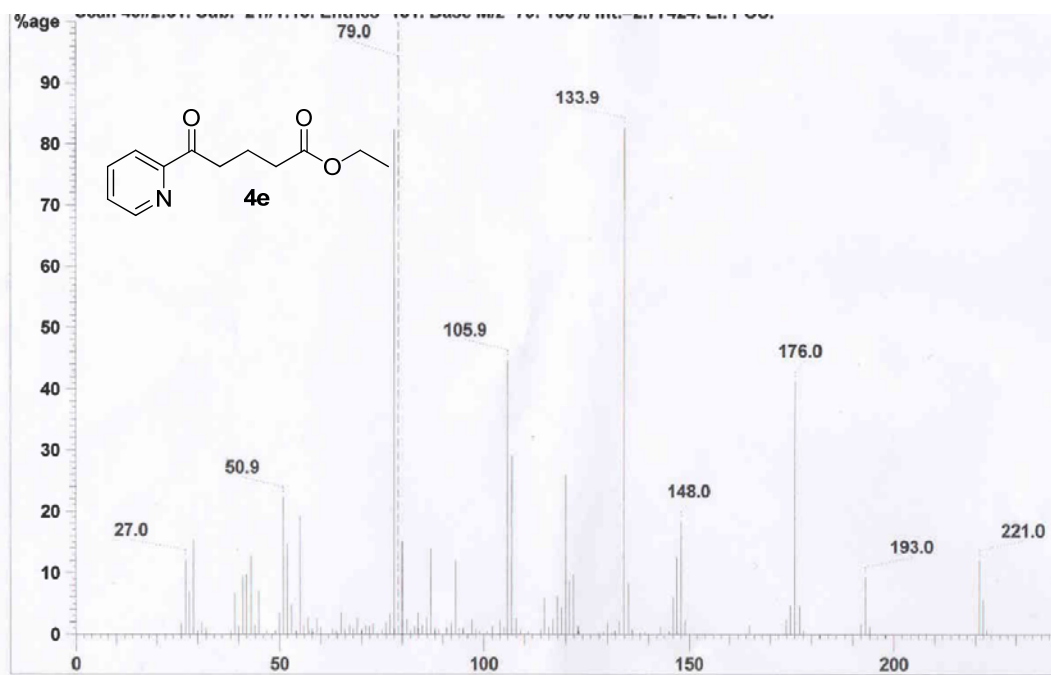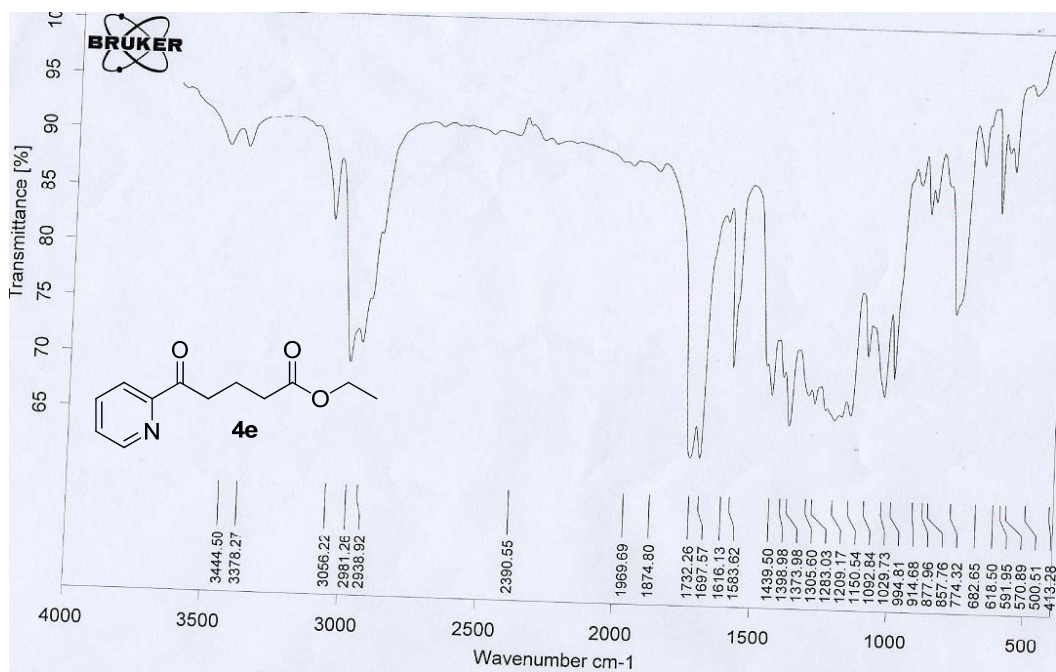

## 4f

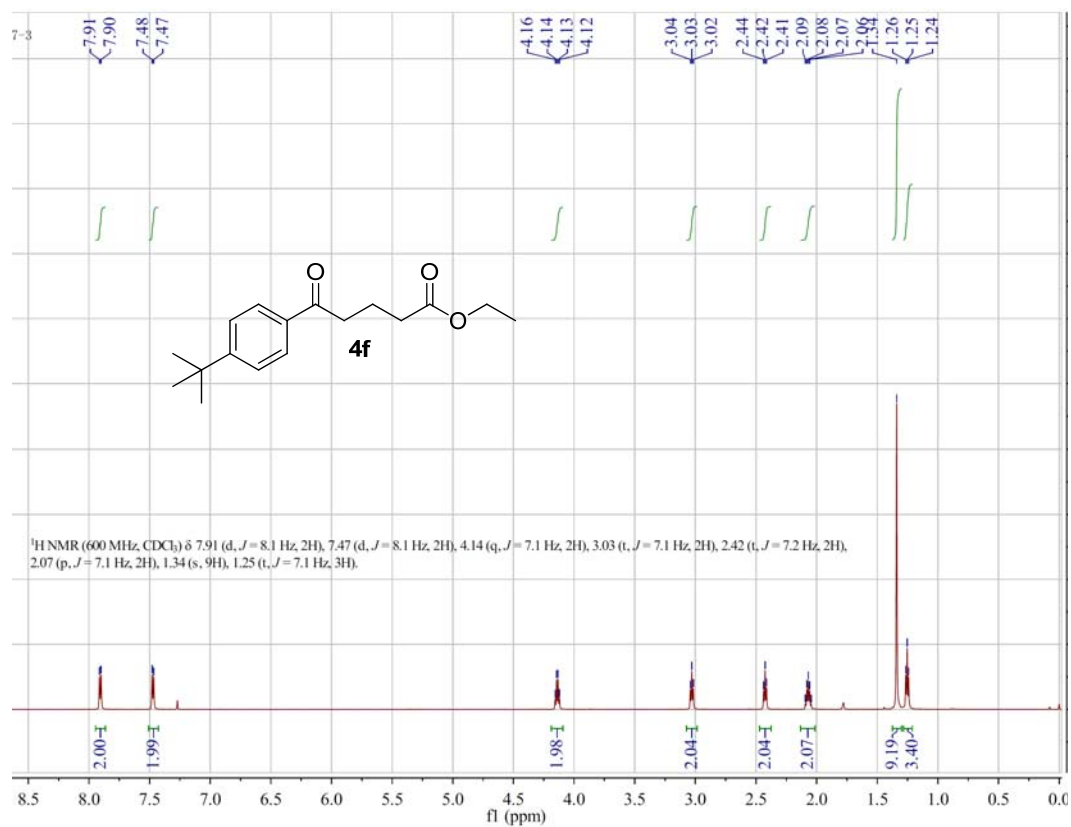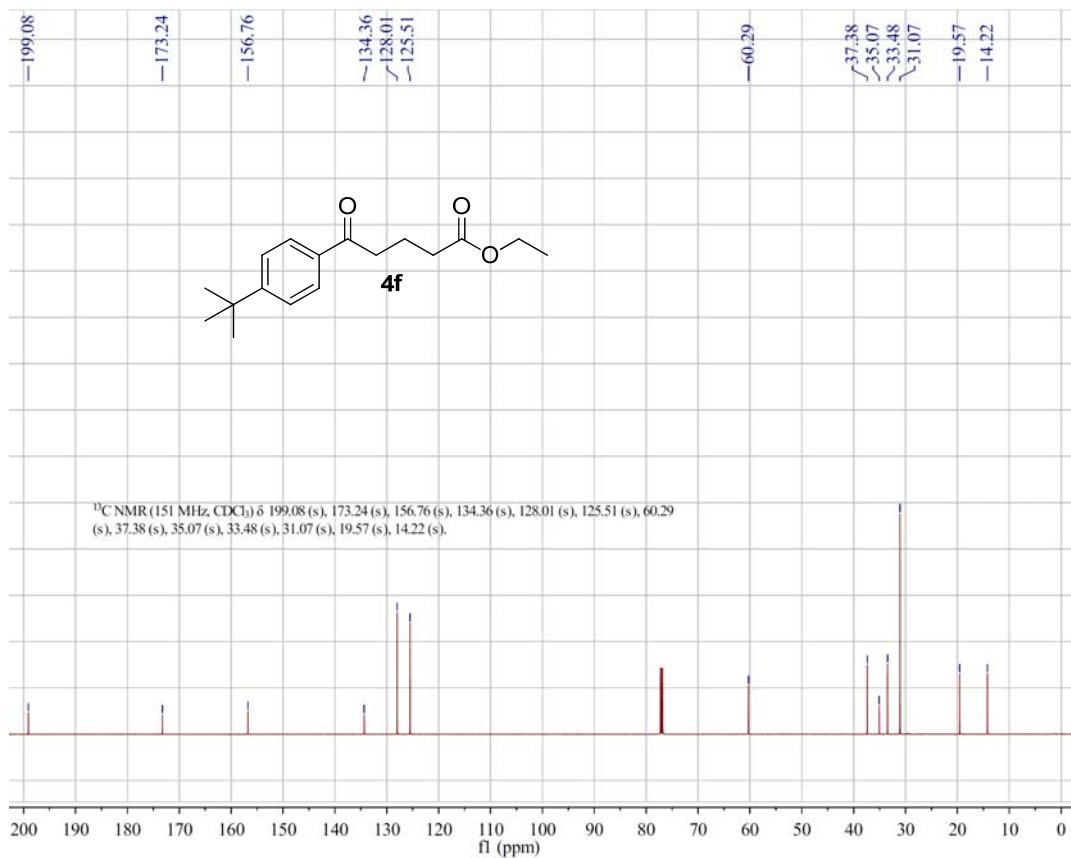



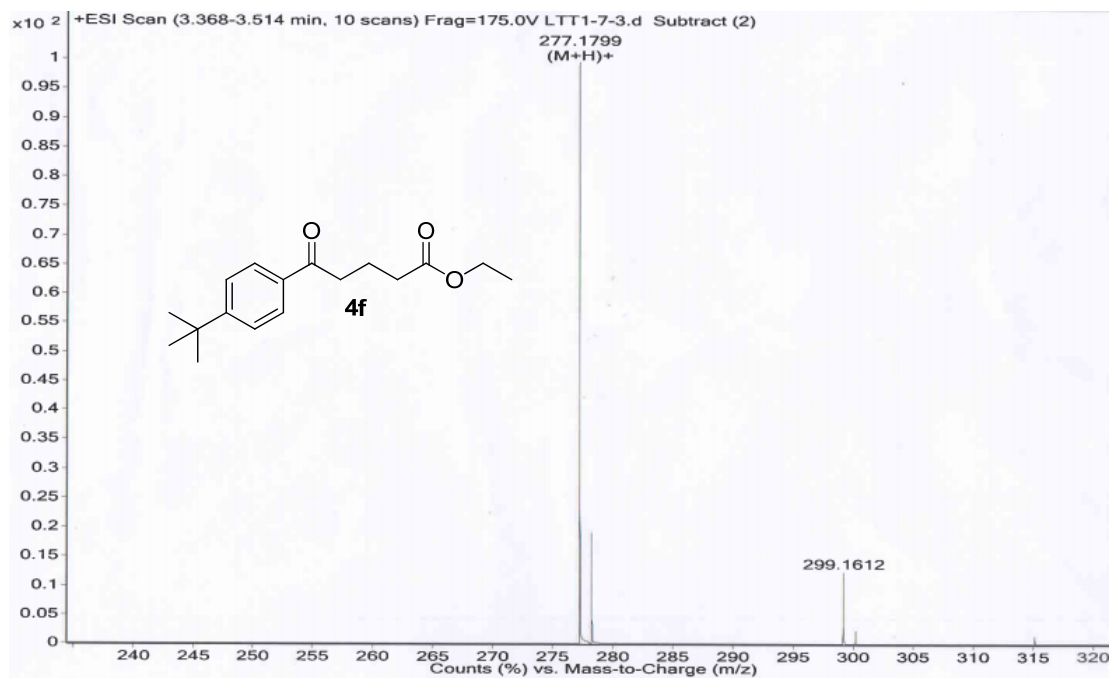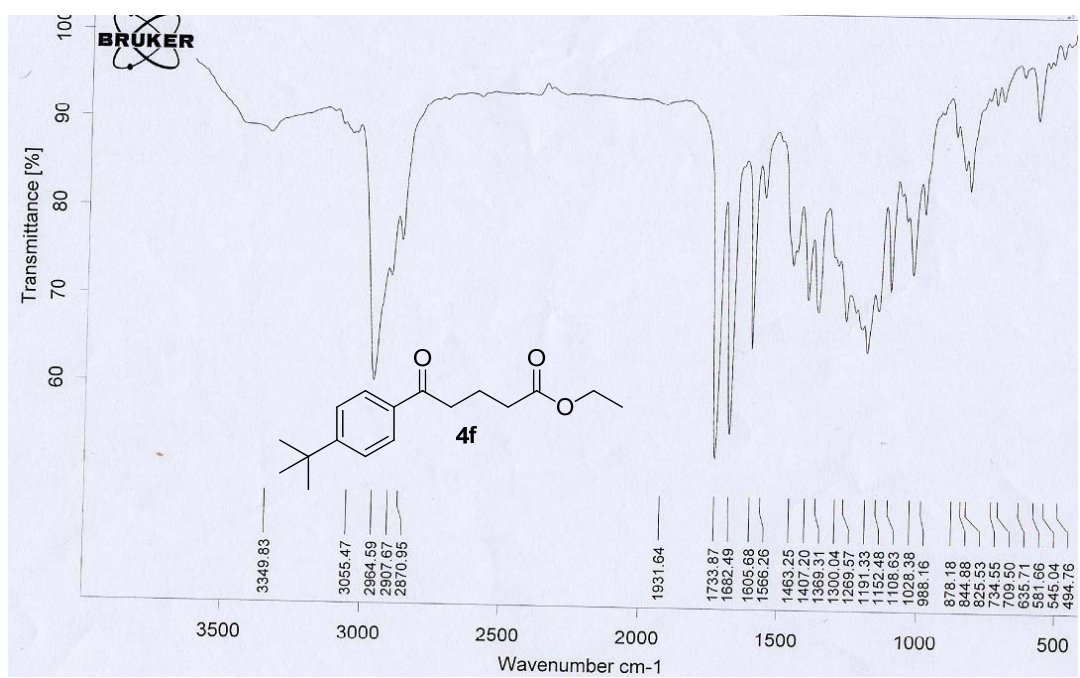

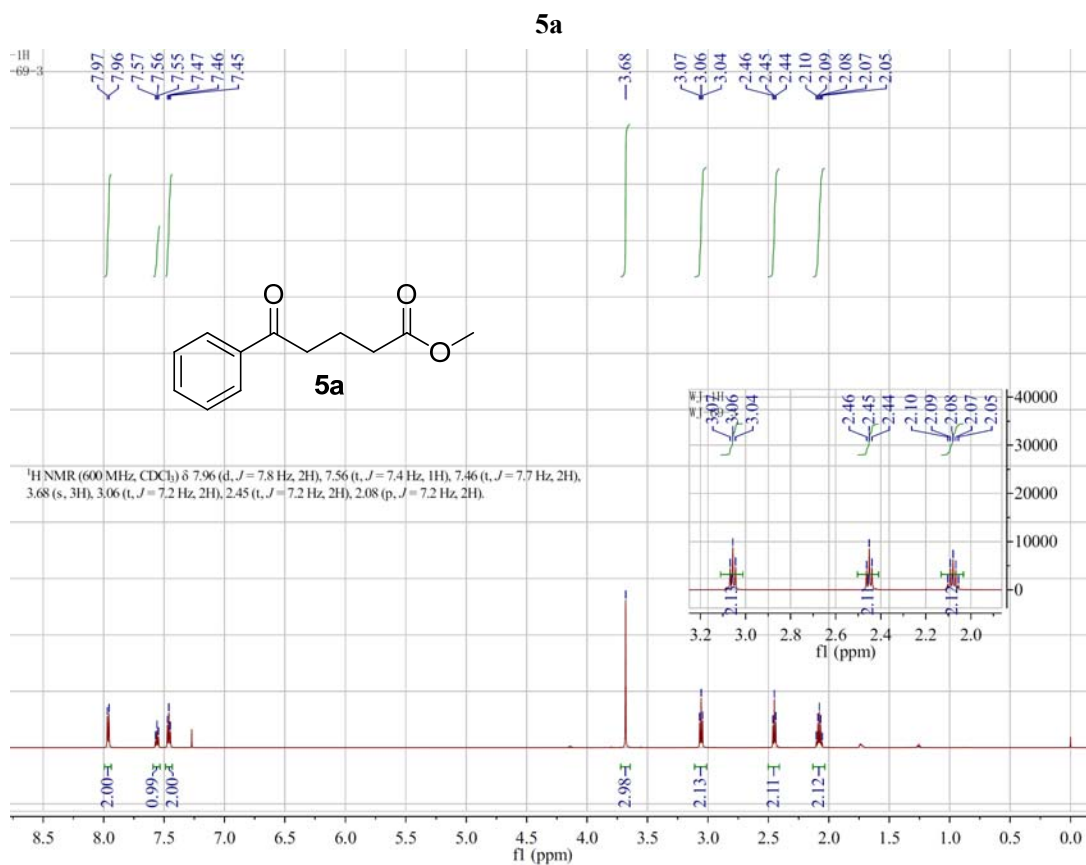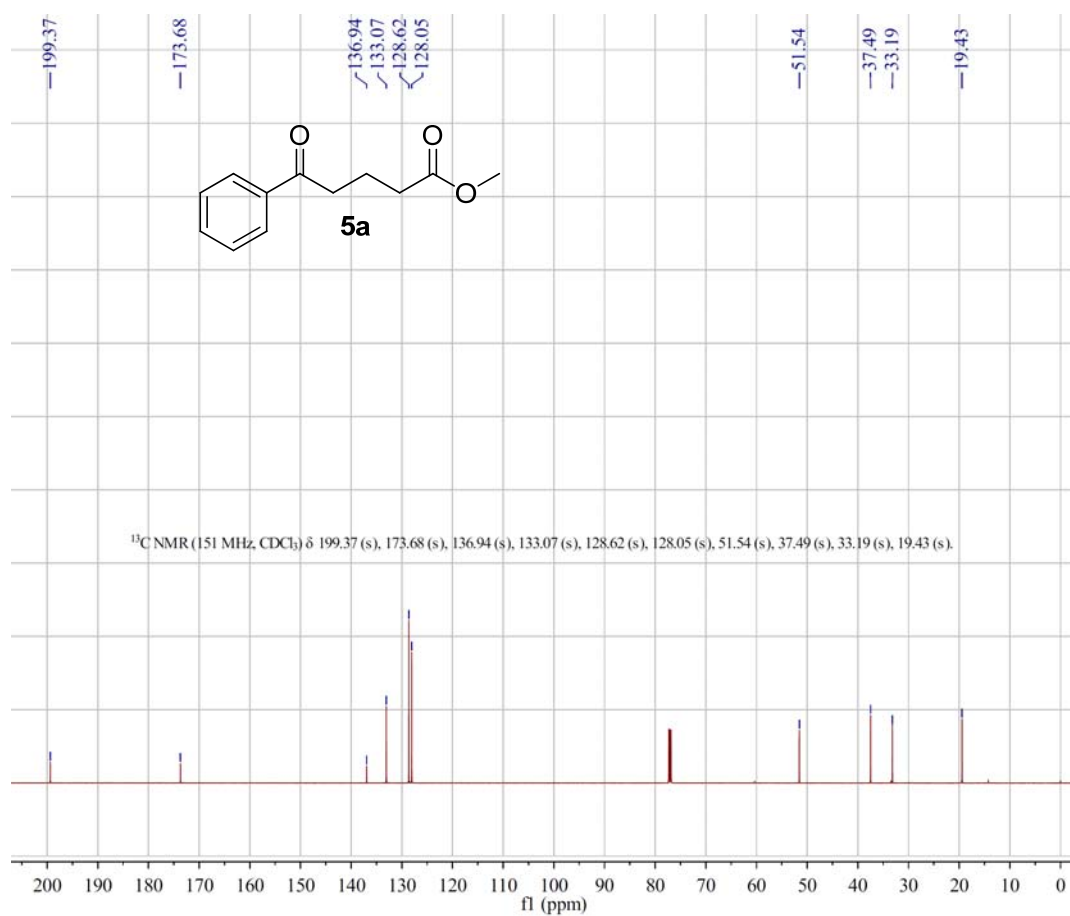

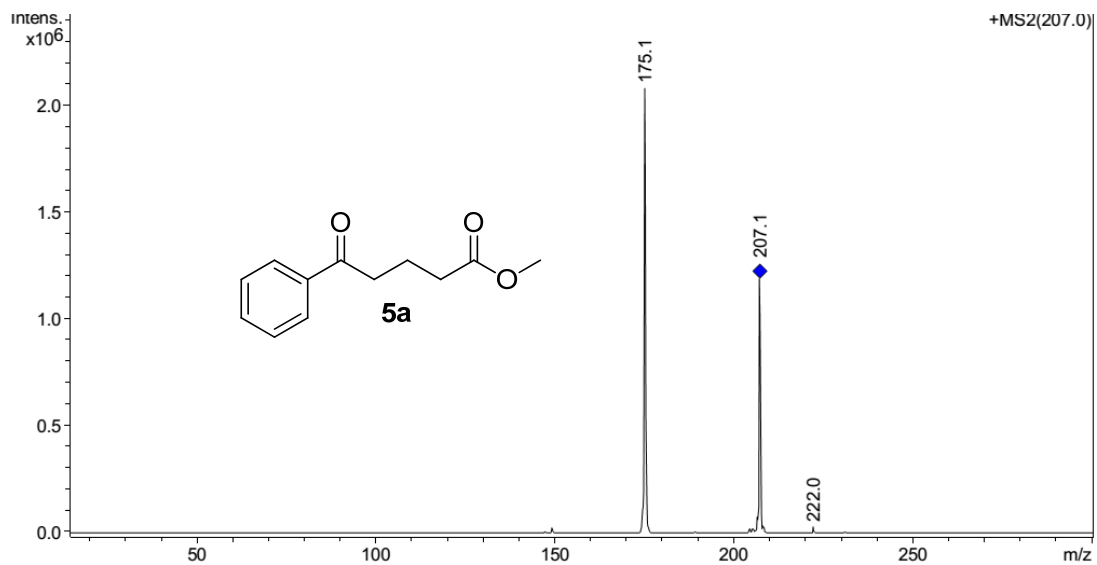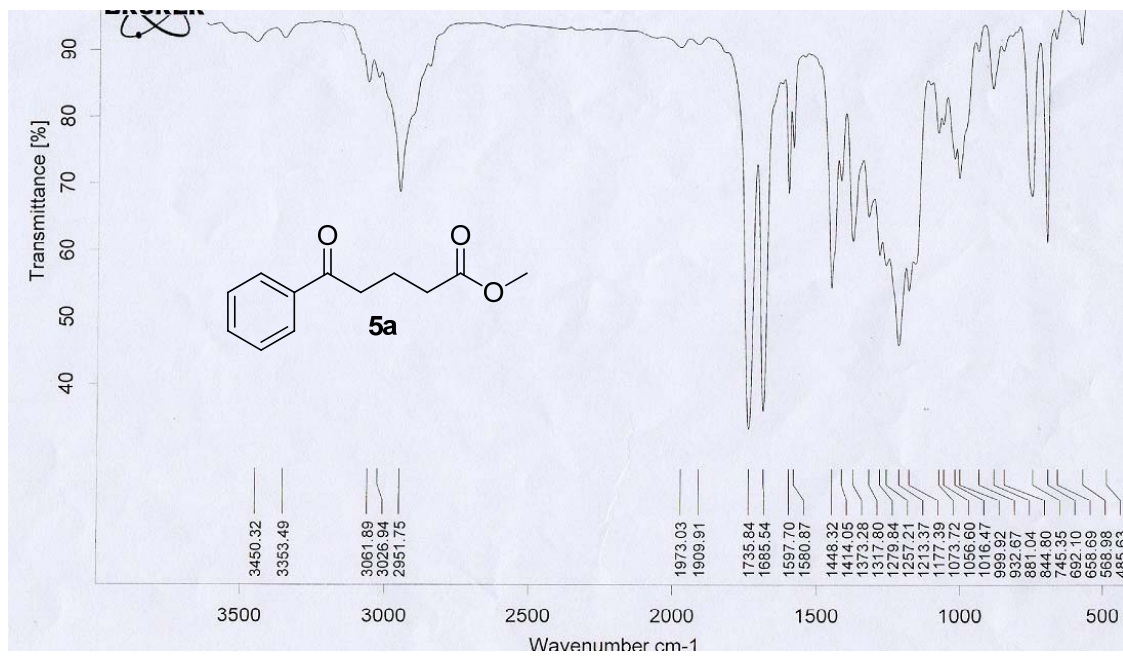

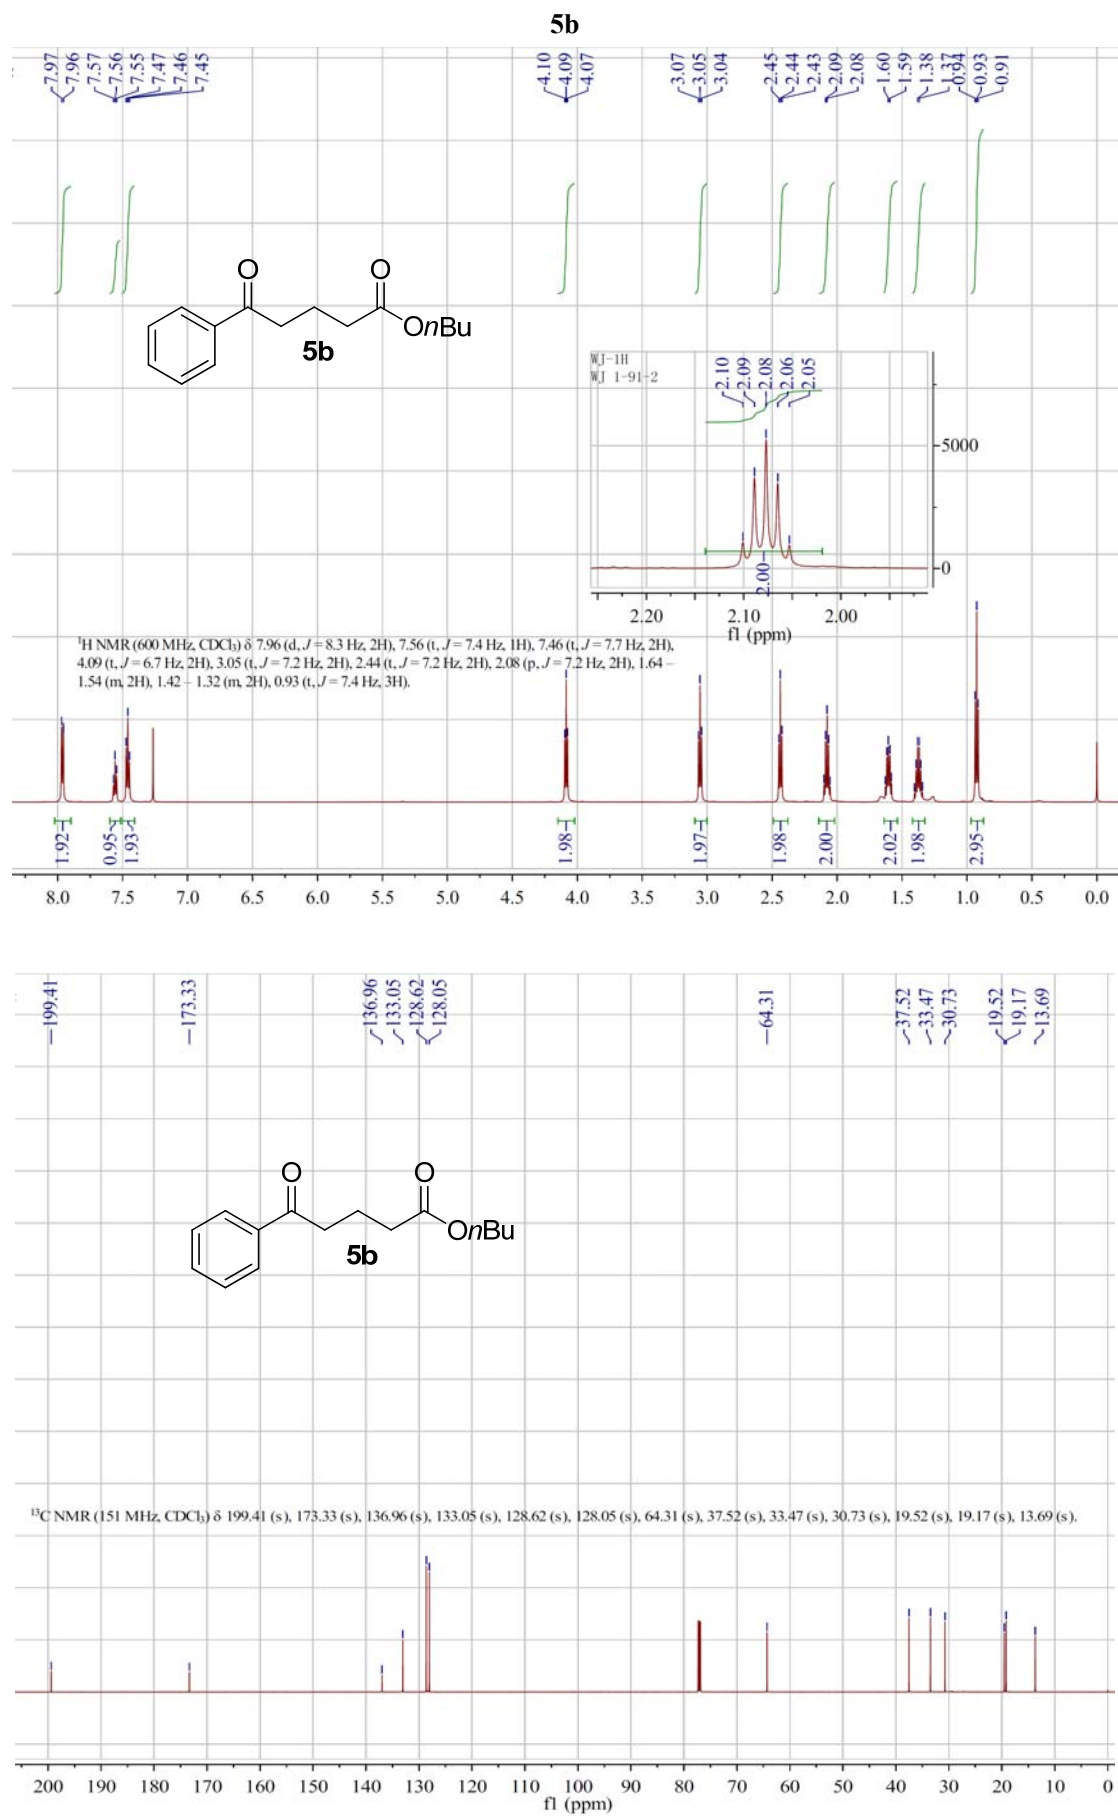

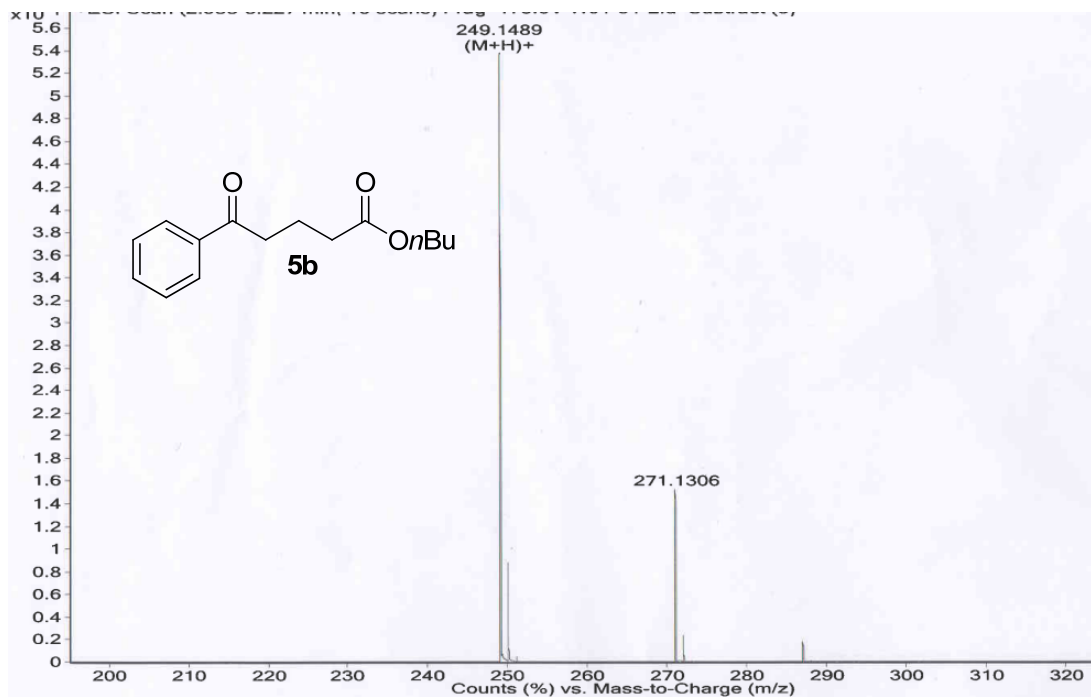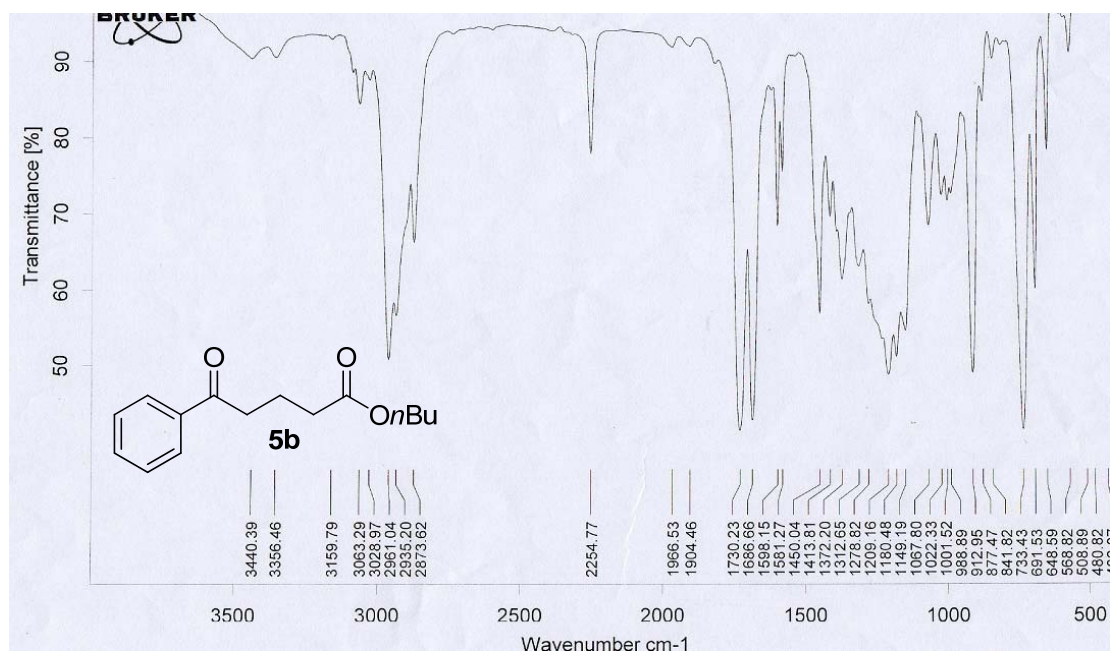

## 5c

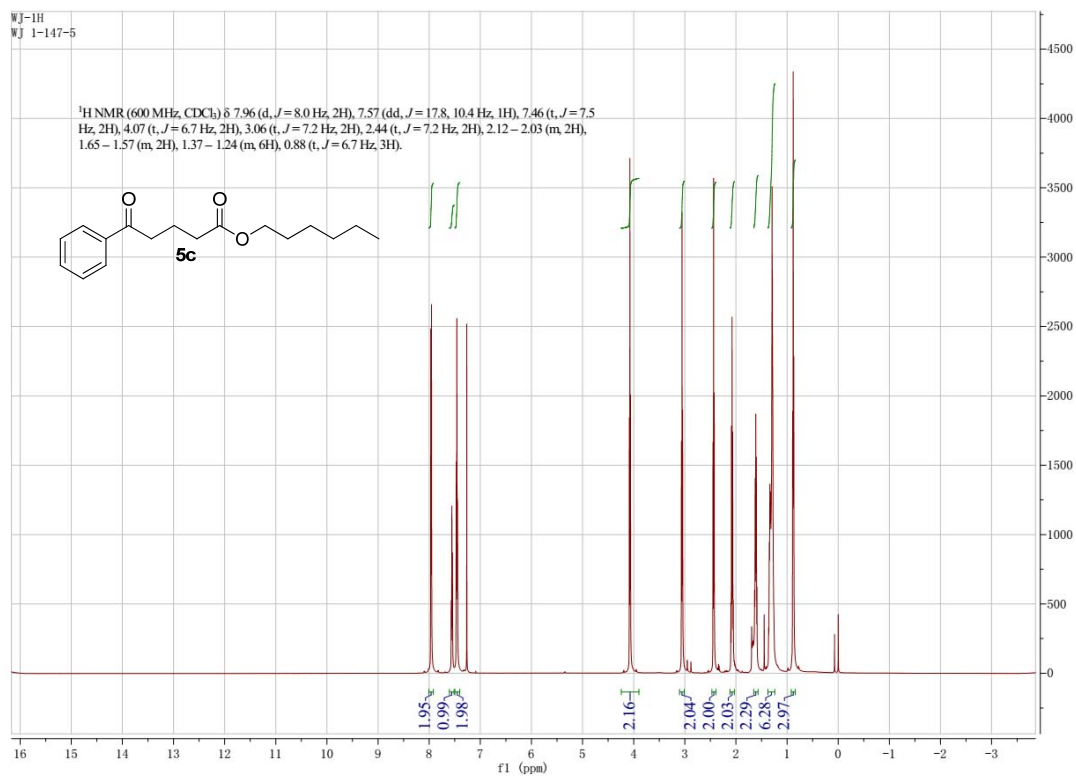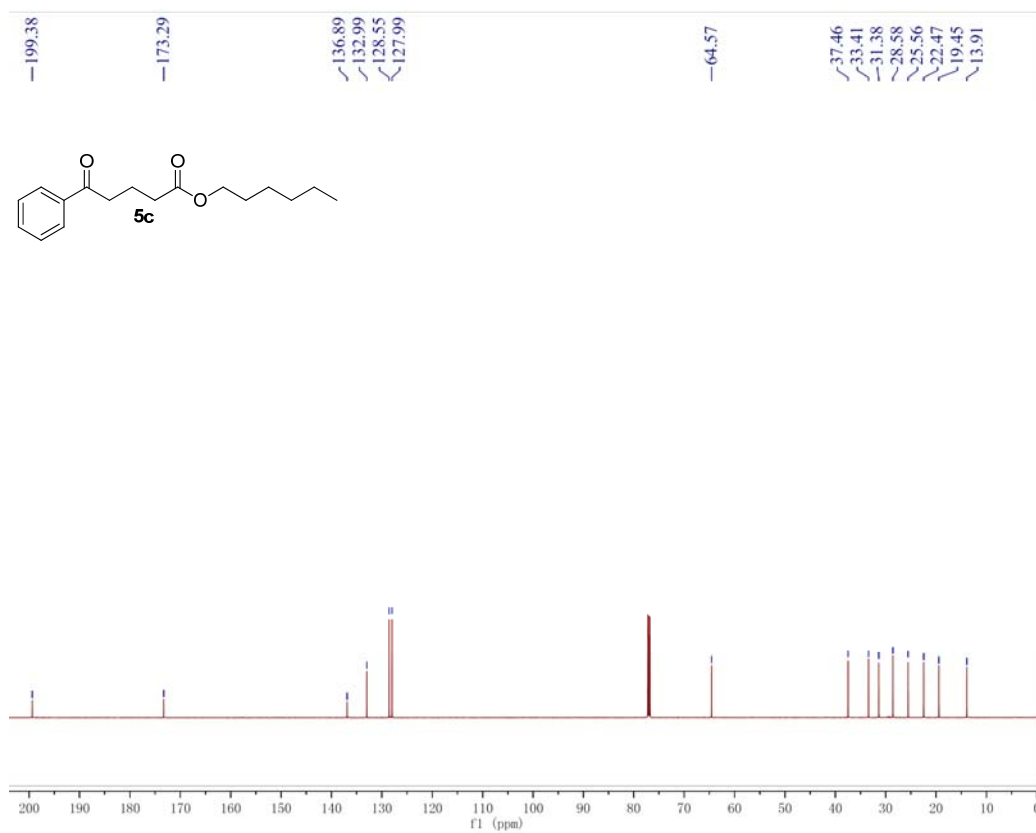

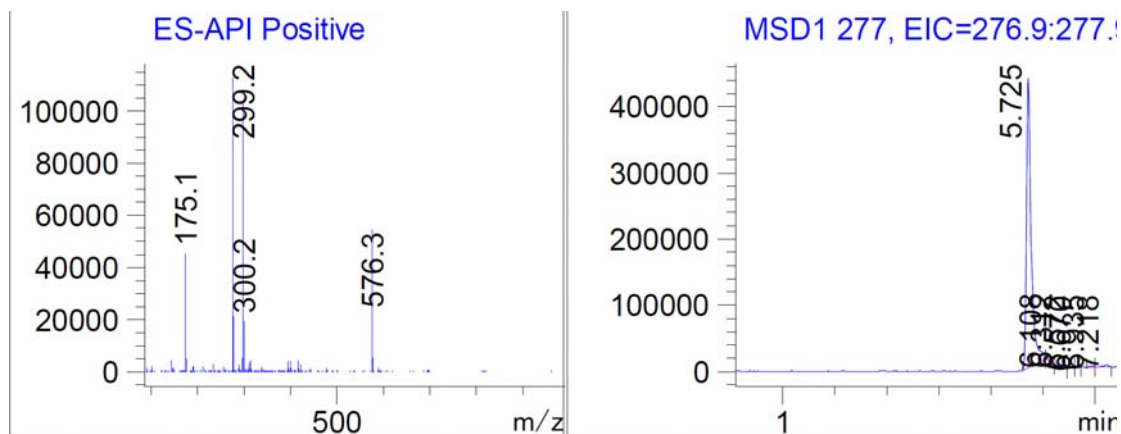

Base Peak Ion Ratios:

2nd Largest Peak Ion Ratios:

| Ion   | Mass   | Abundance | Ratio  | Ion   | Mass   | Abundance | Ratio  |
|-------|--------|-----------|--------|-------|--------|-----------|--------|
| A     | 277.20 | 112830    | 100.00 | B     | 299.20 | 104152    | 100.00 |
| A + 1 | 278.20 | 21420     | 18.98  | B + 1 | 300.20 | 19318     | 18.55  |
| A + 2 | 279.20 | 4159      | 3.69   | B + 2 | 301.10 | 3885      | 3.73   |
| A + 3 | 280.20 | 635       | 0.56   | B + 3 | 302.05 | 583       | 0.56   |
| A + 4 | 281.10 | 167       | 0.15   | B + 4 | 303.25 | 144       | 0.14   |
| A + 5 | 282.05 | 101       | 0.09   | B + 5 | 304.35 | 30        | 0.03   |

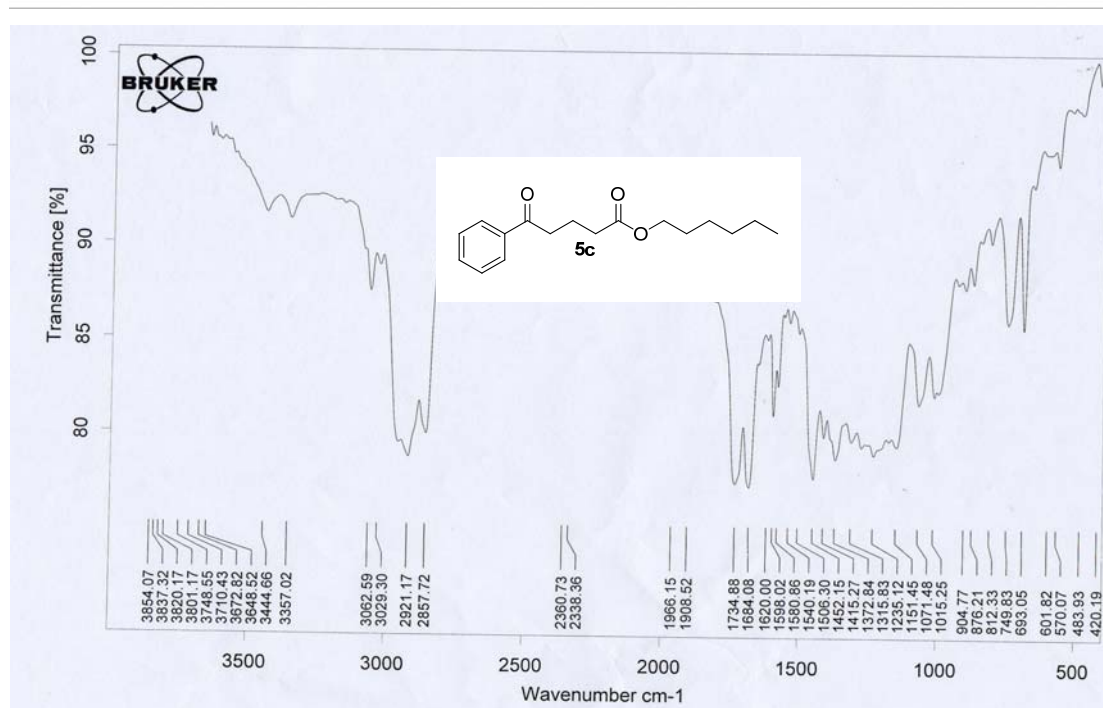

## 5d

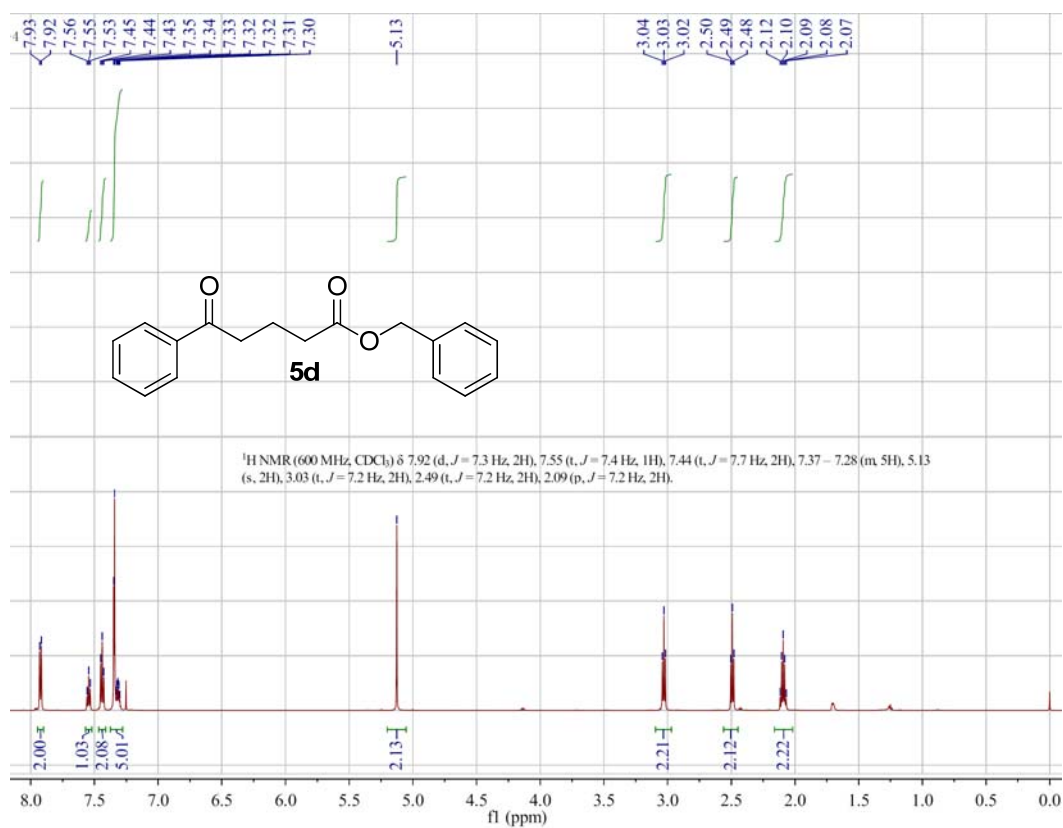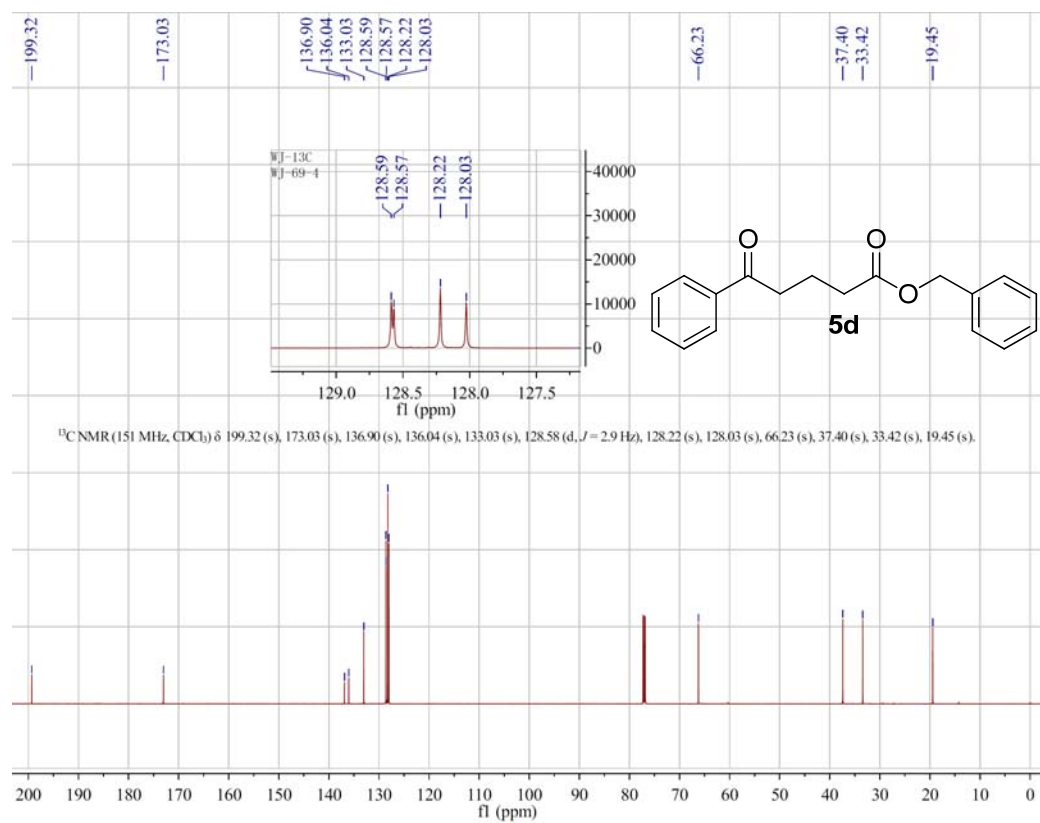



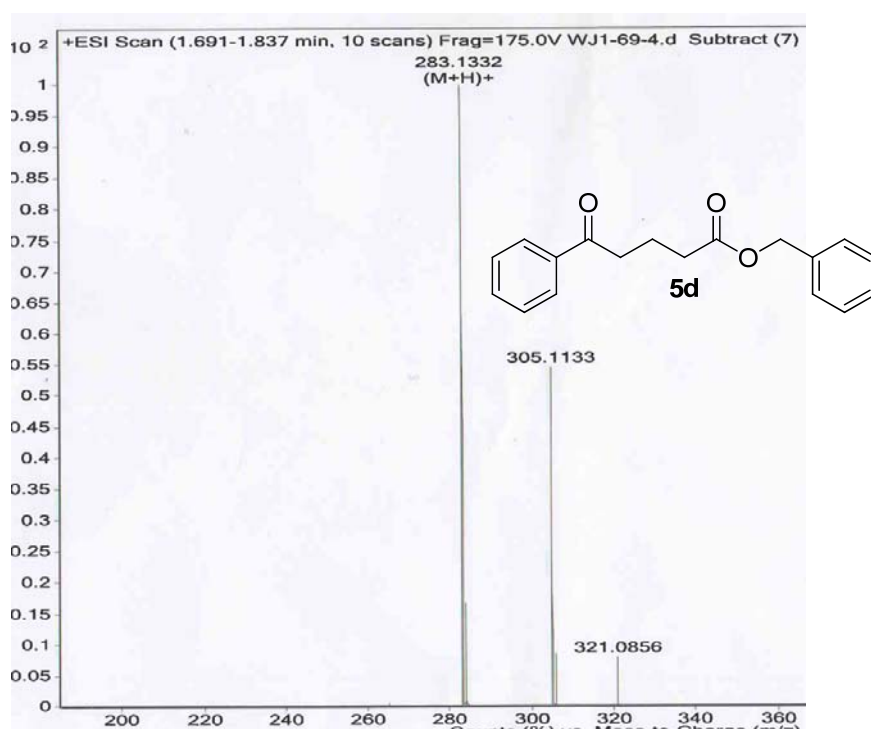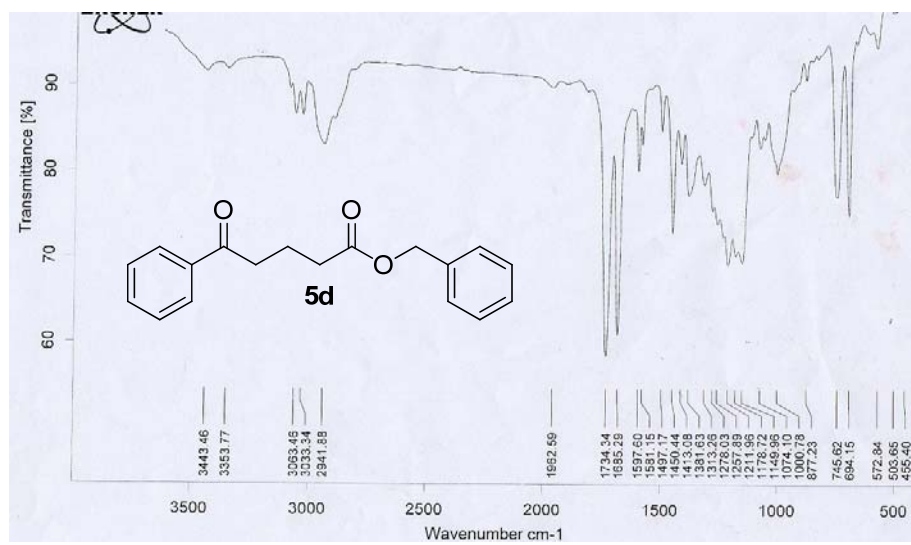

## 5e

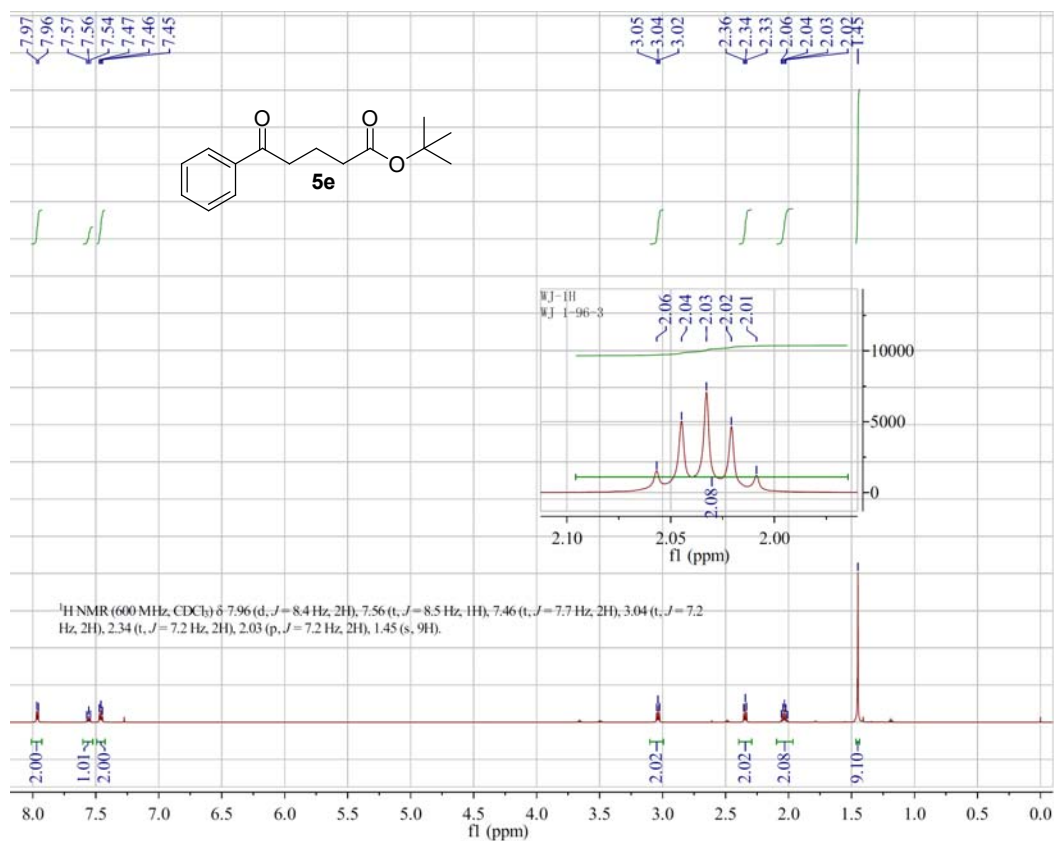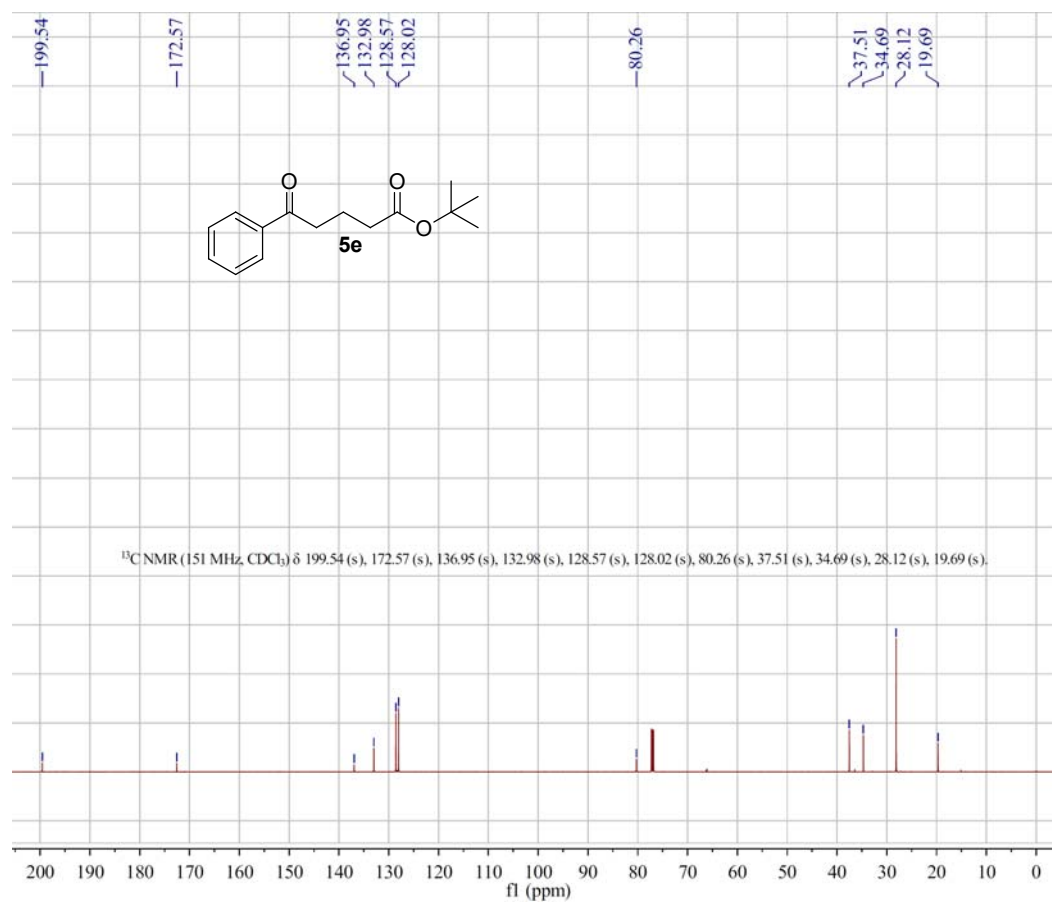

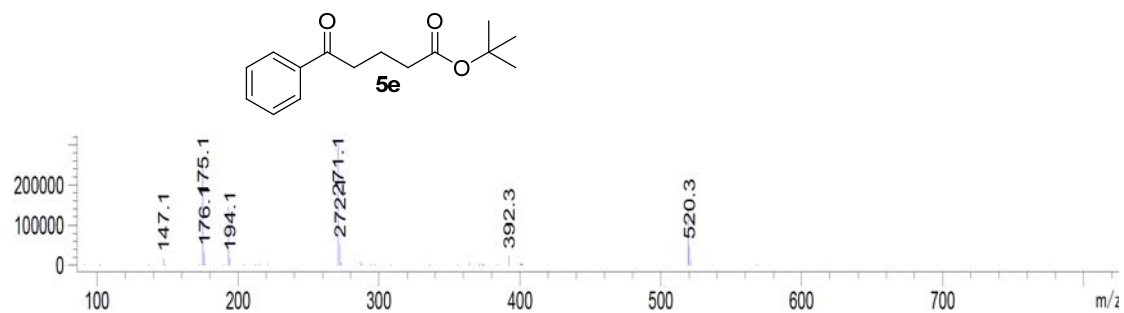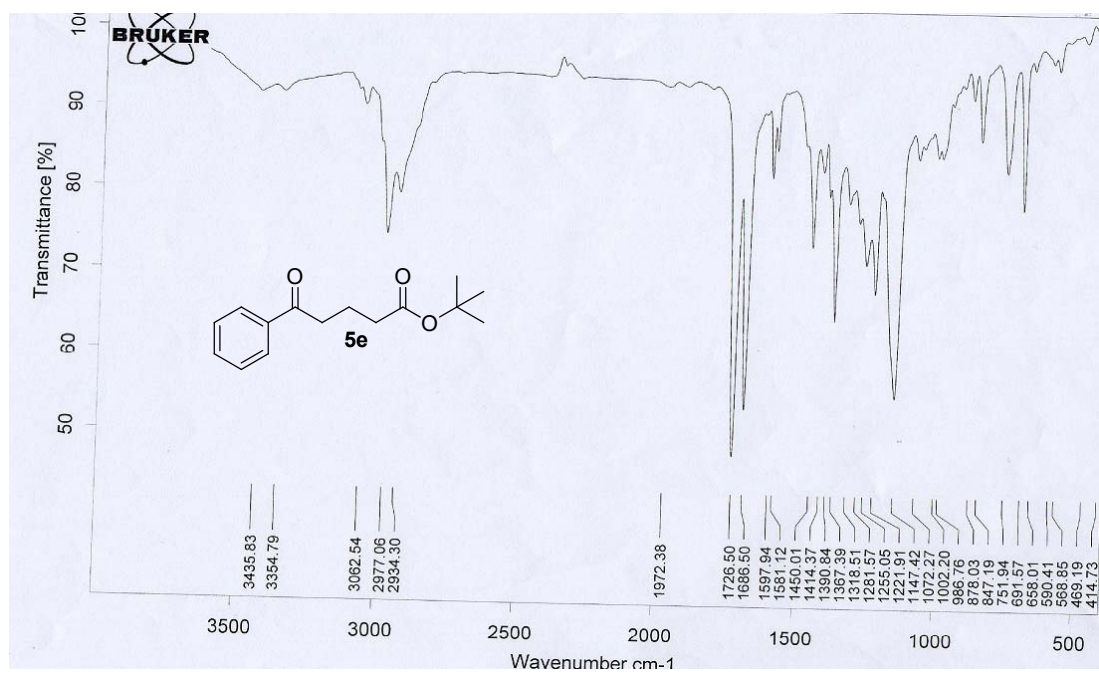

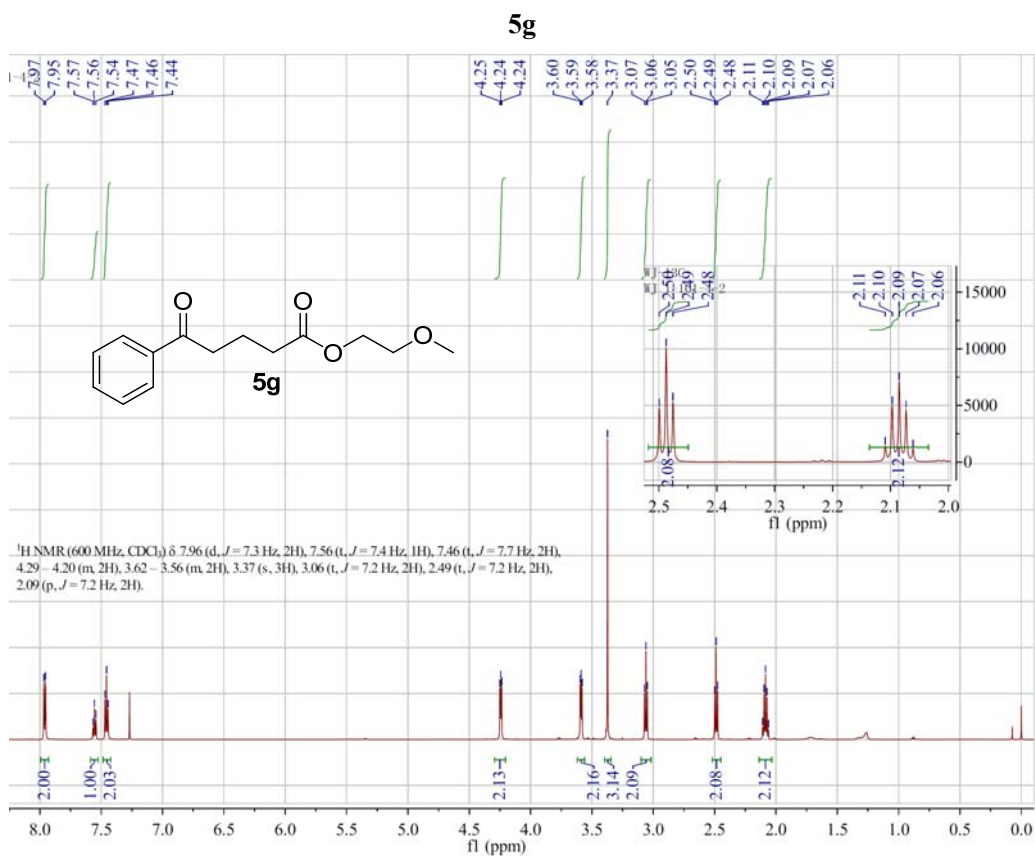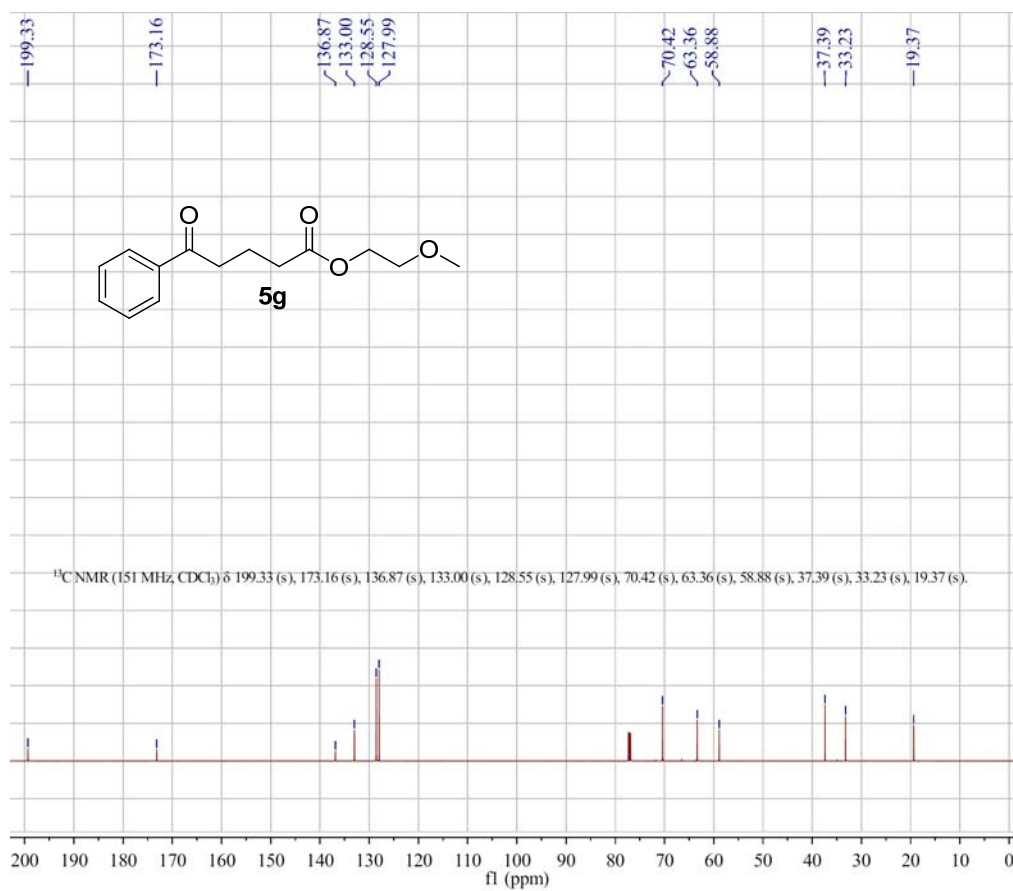

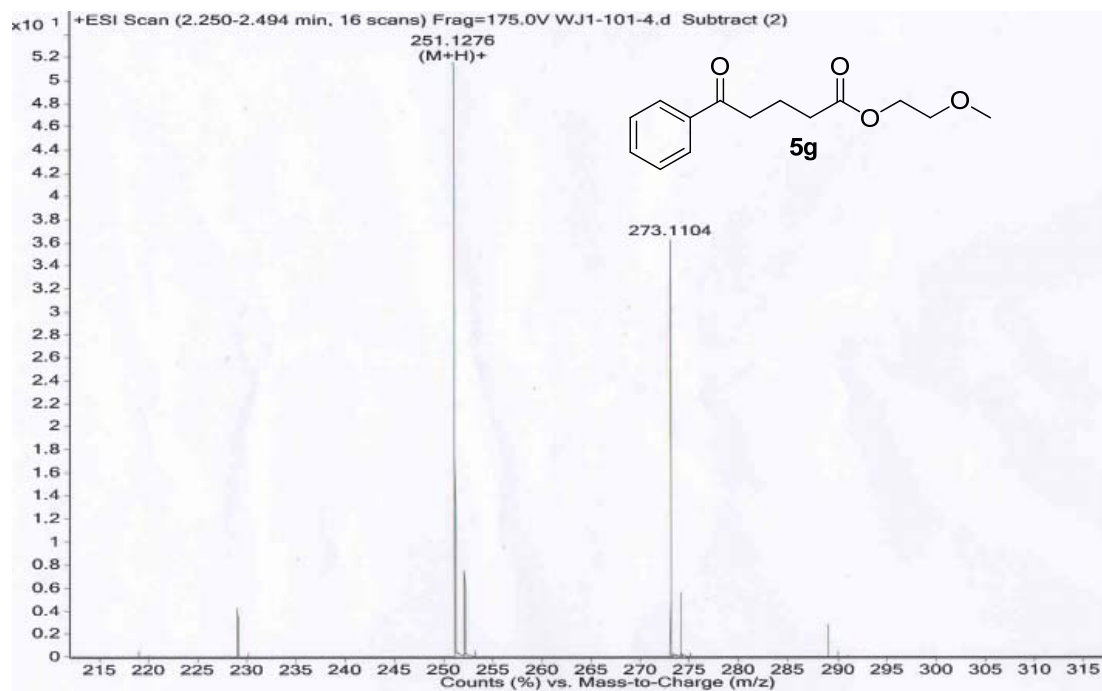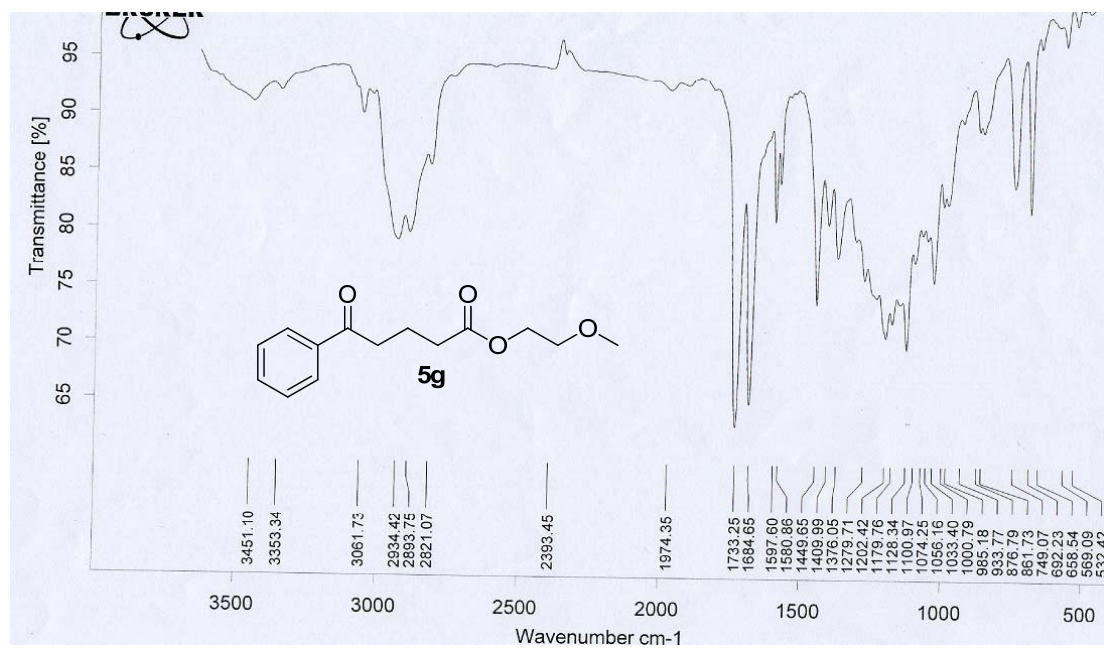

## 5h

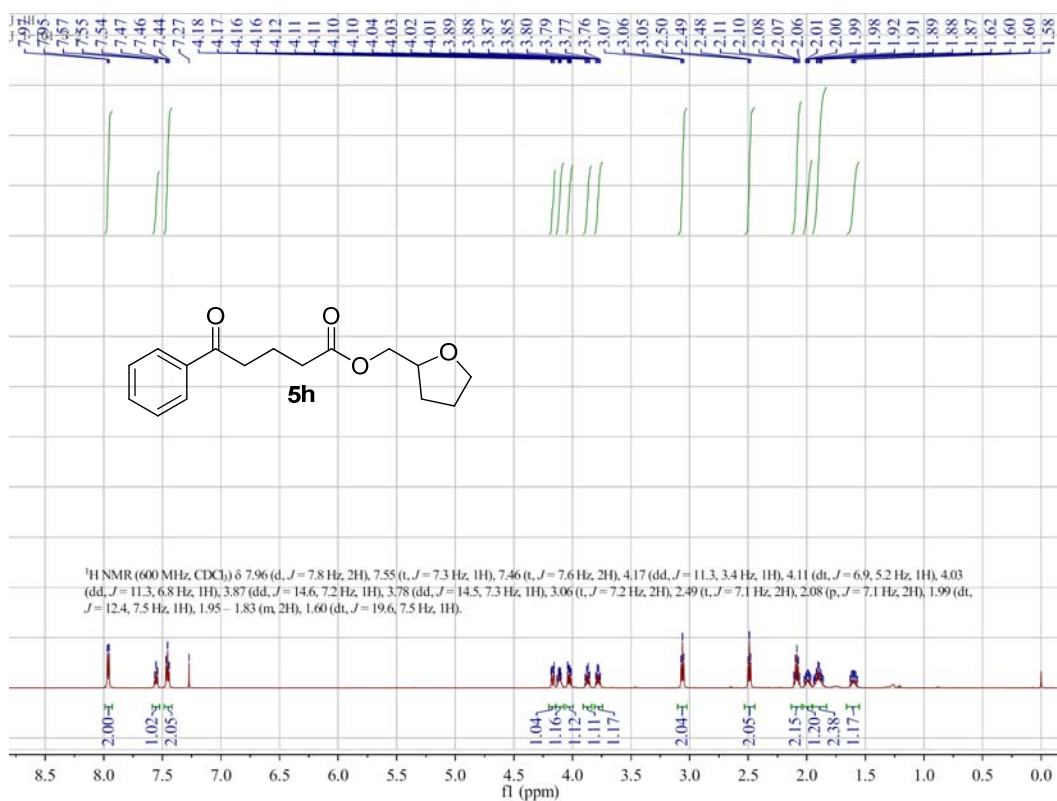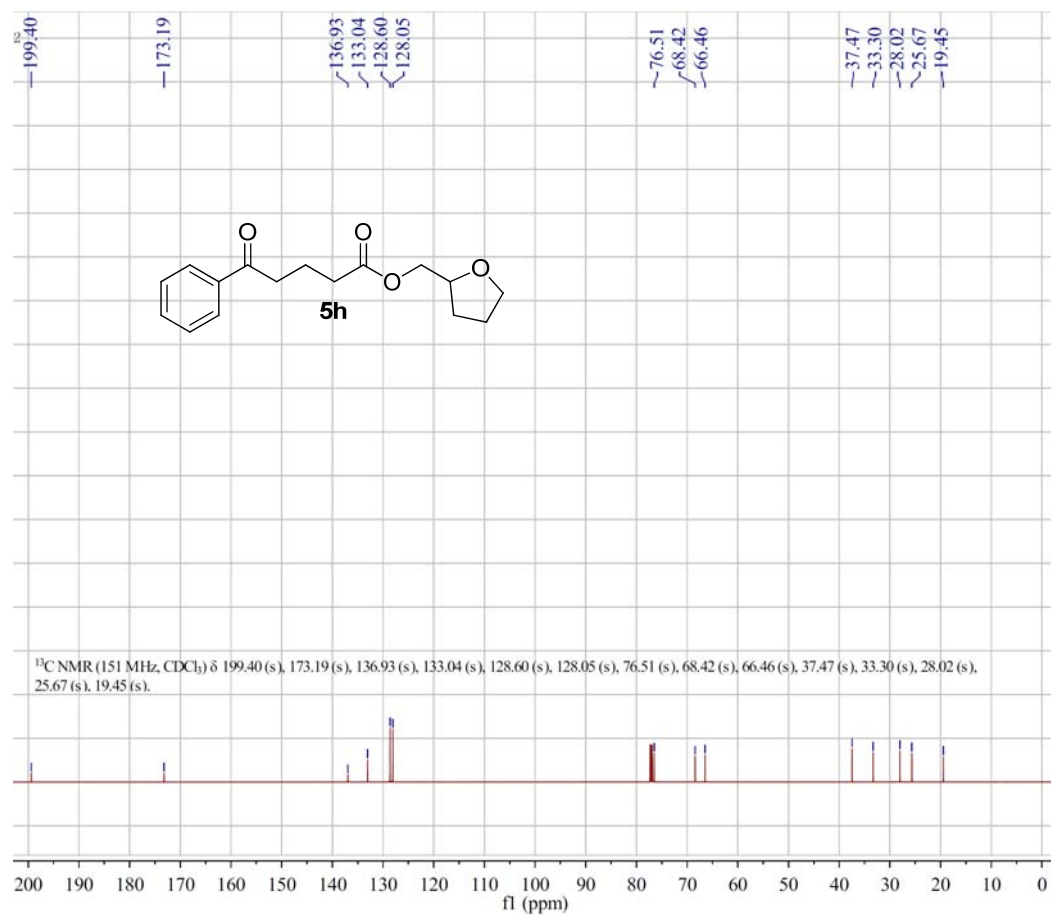

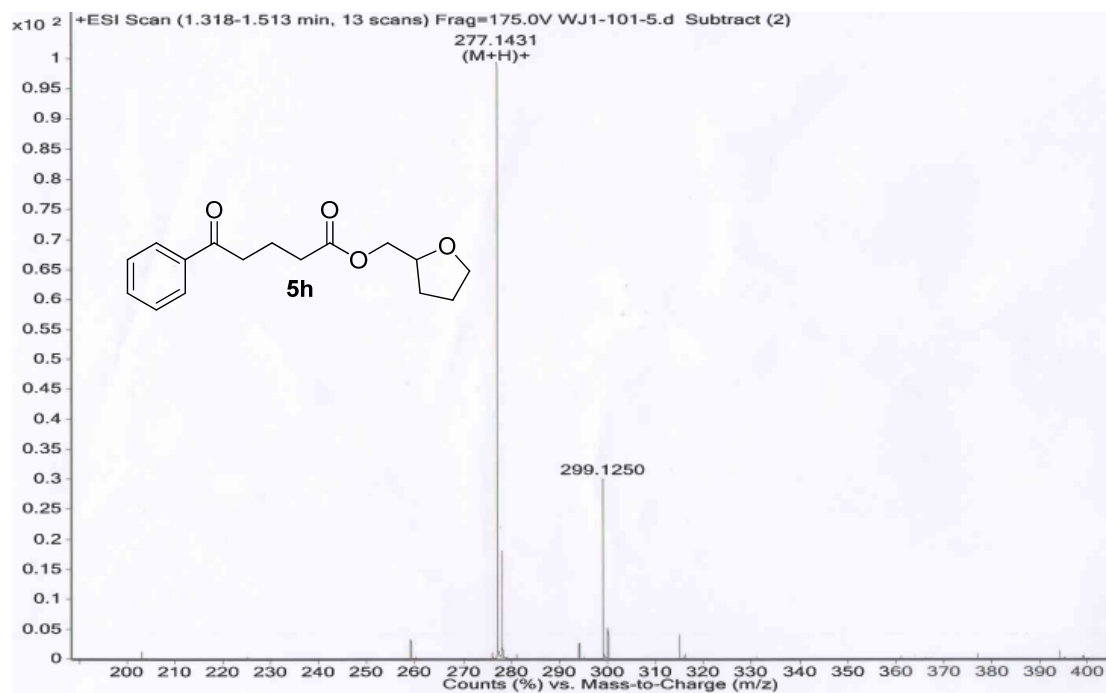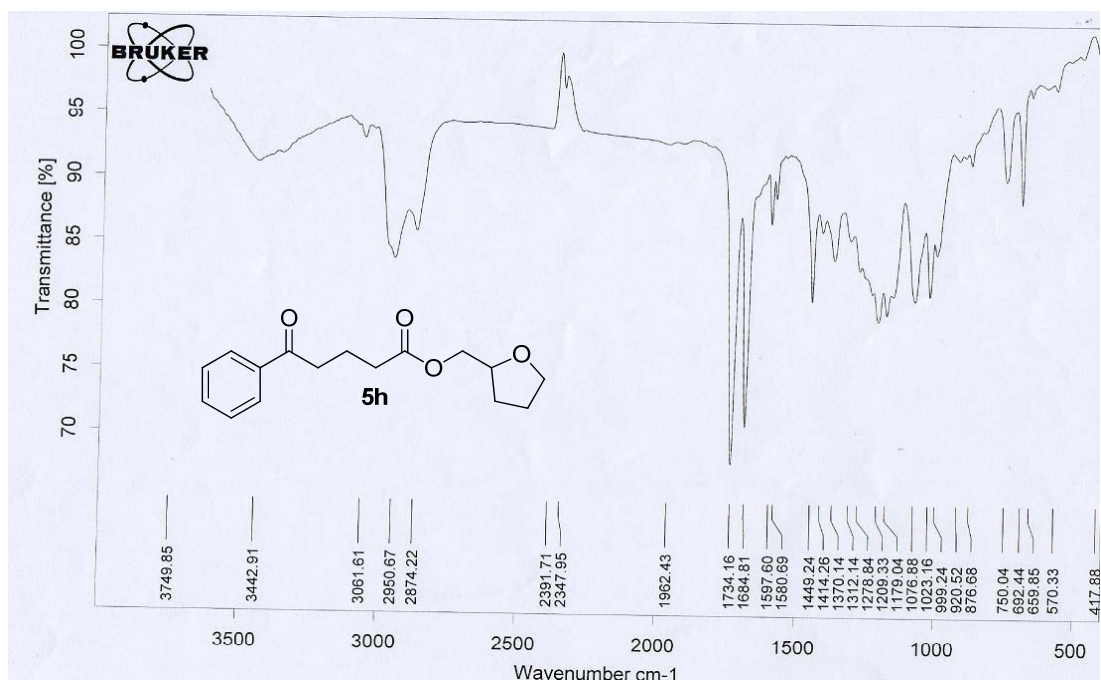

## 5i

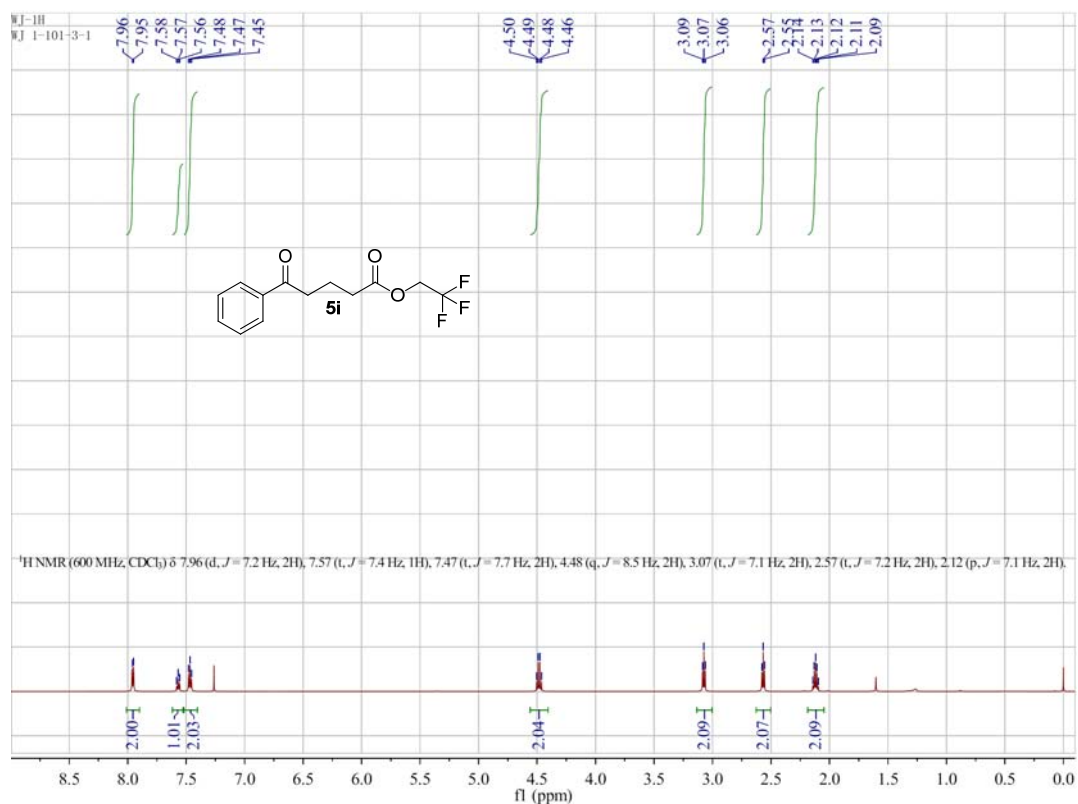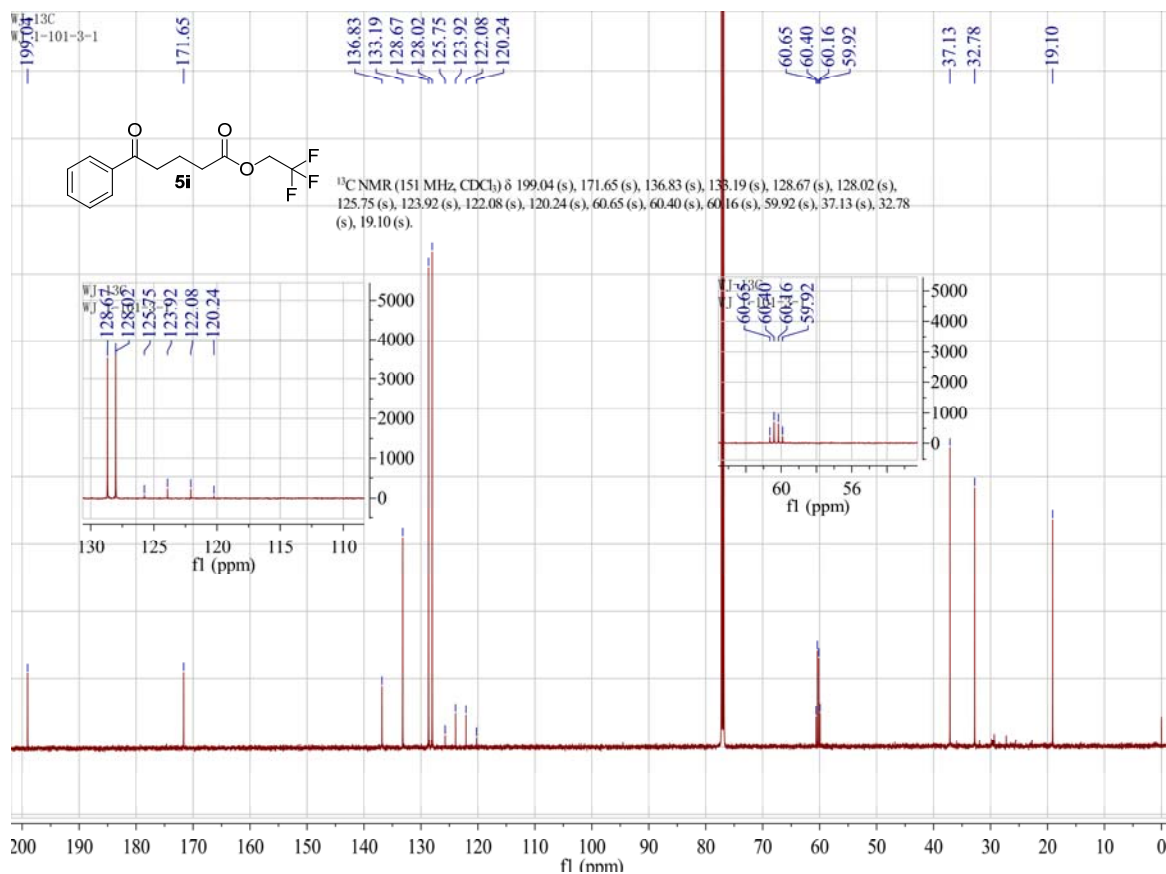



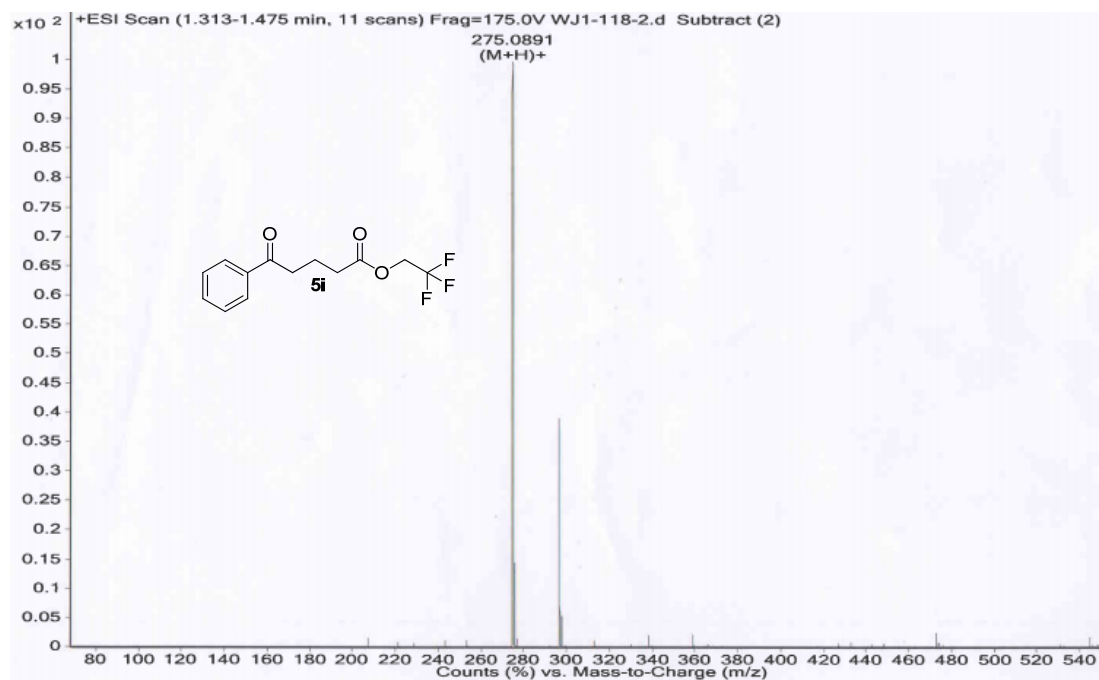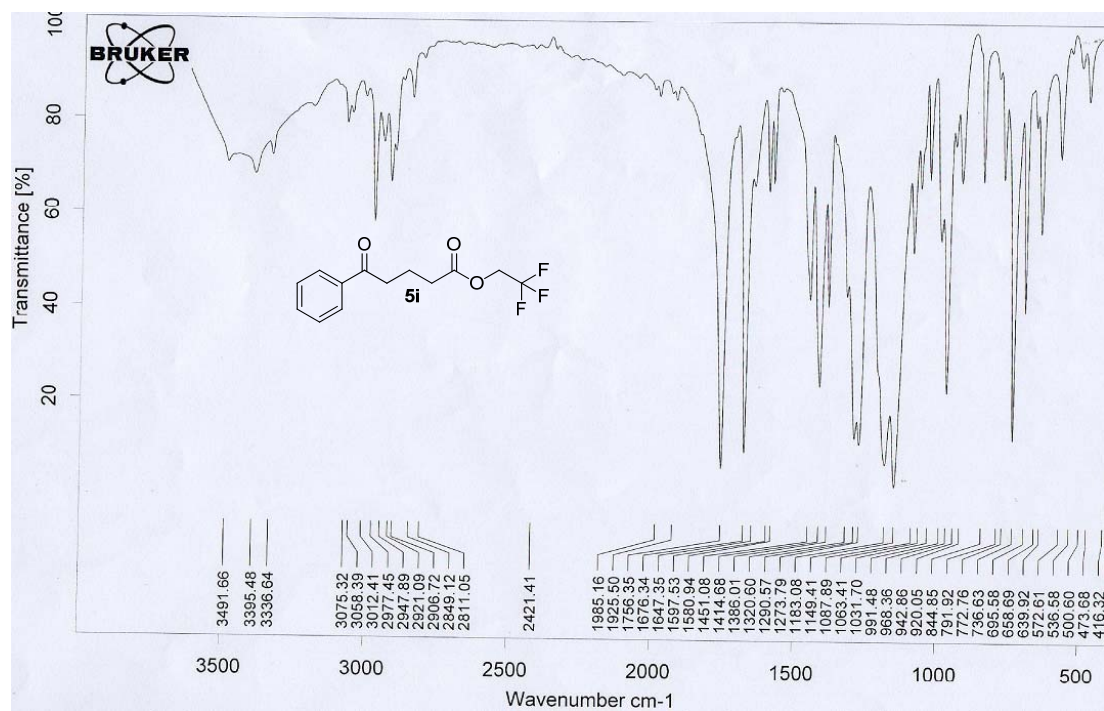

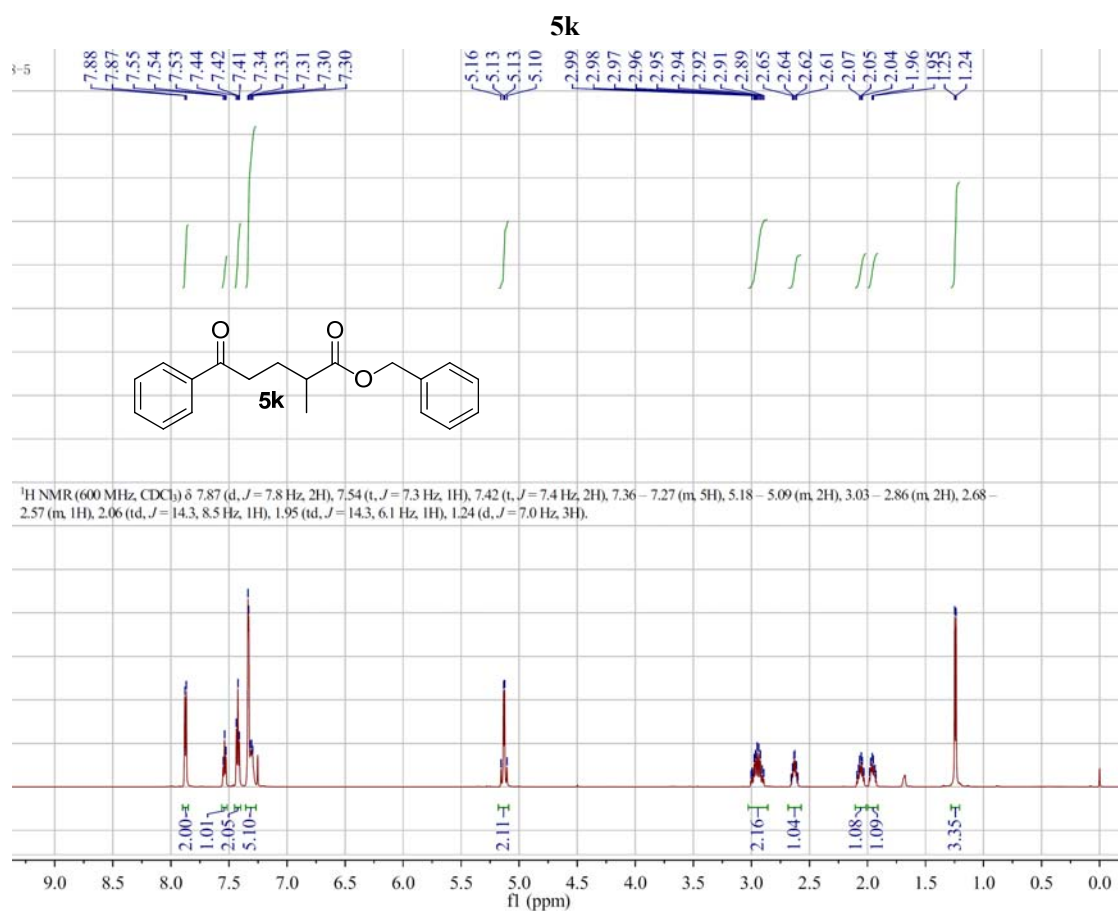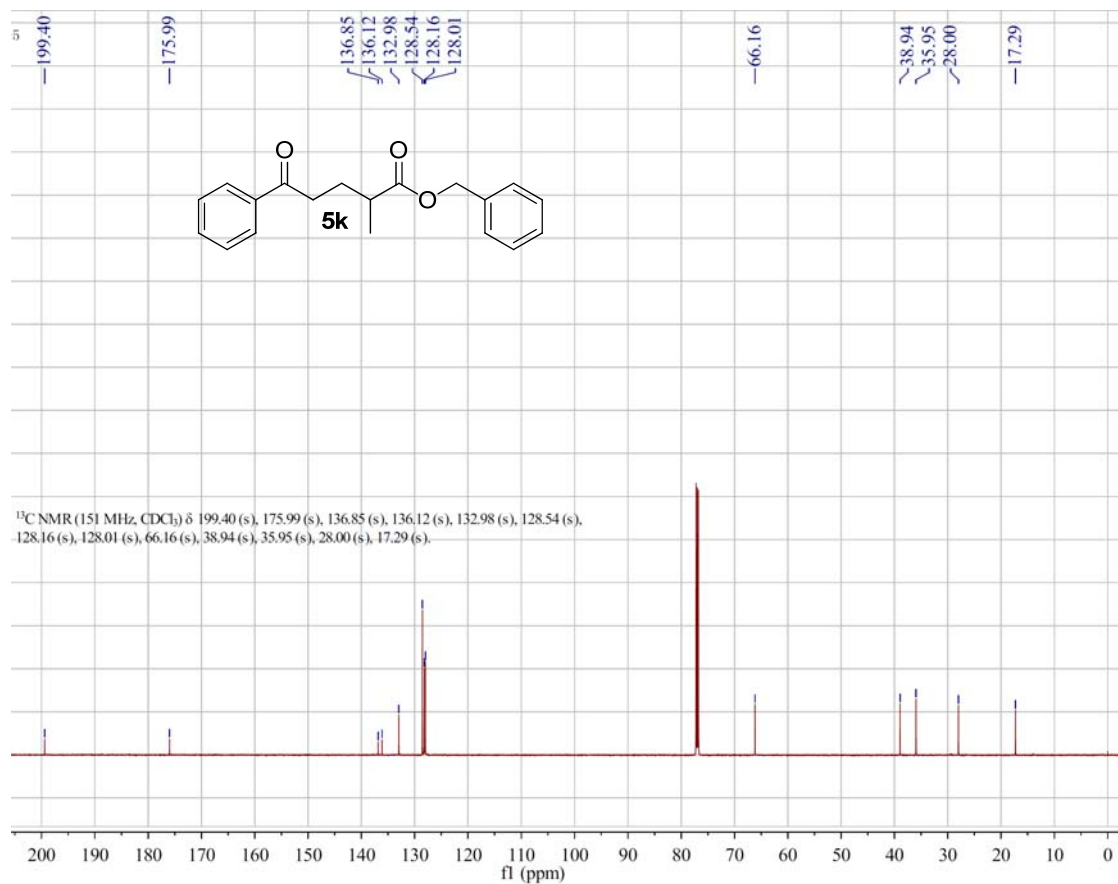

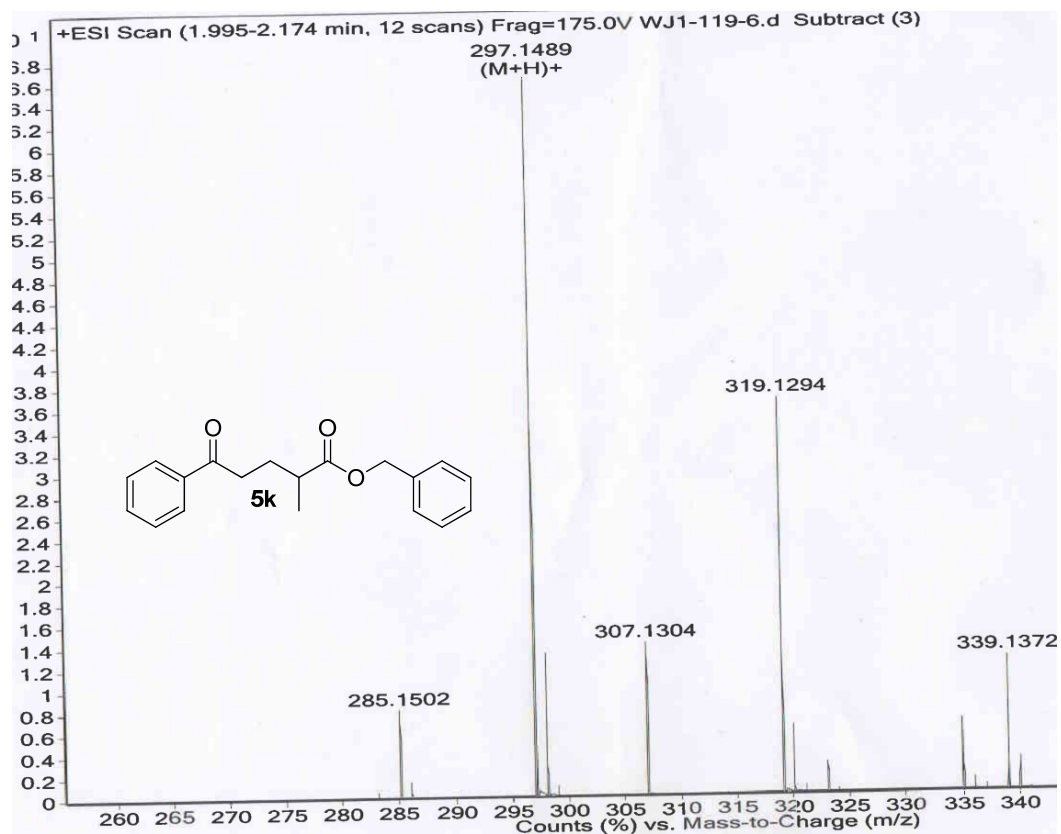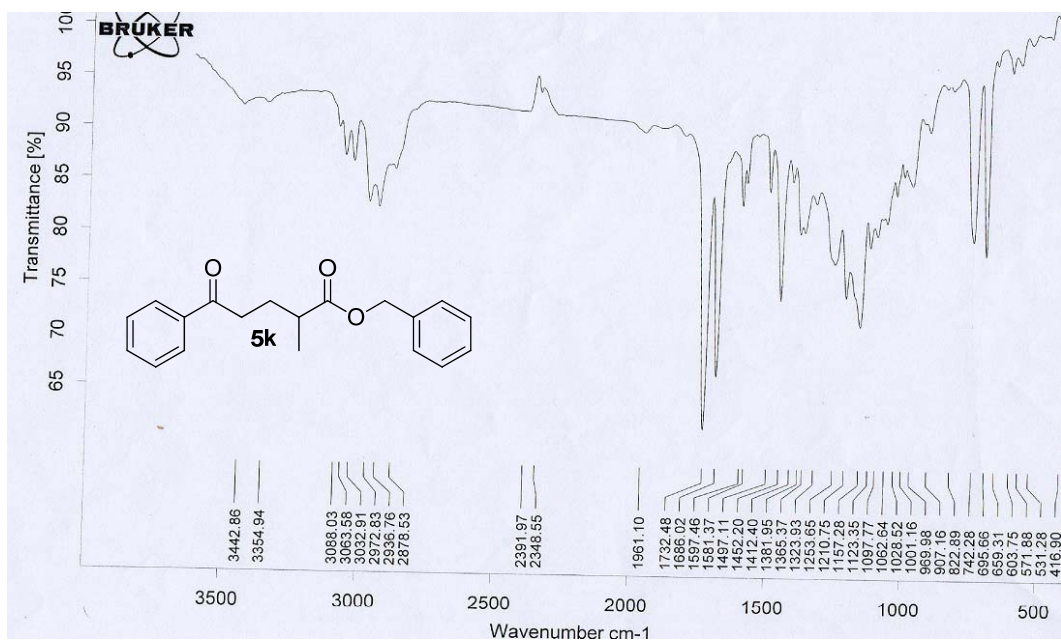

Supplement: c5ob02570b1.pdf [file c5ob02570b1.pdf]
